# Supplementary material
Source: HighWire-hosted journal article supplement (https://jcp.bmjjournals.com/content/suppl/2007/05/17/jcp.2006.038653)
Supplement: 605576webonlytable.pdf [file 605576webonlytable.pdf]

**Supplementary Table 1a** Comparison of 16S rRNA gene sequences of medically important *Clostridium* species

|      | CA   | CAr  | CB   | CBe  | CBi  | CBo  | CBu  | CC   | CCr  | CCe  | CCh  | CCl  | CCo  | CCm  | CD   | CDi   | CF   | CG   | CGly | CH   | CHr  |
|------|------|------|------|------|------|------|------|------|------|------|------|------|------|------|------|-------|------|------|------|------|------|
| CA   | -    | 78.0 | 80.4 | 81.4 | 79.1 | 76.5 | 80.6 | 80.7 | 80.3 | 85.3 | 81.1 | 89.8 | 88.8 | 77.6 | 78.1 | 79.3  | 80.4 | 77.5 | 79.8 | 78.9 | 82.1 |
| CAr  | 82.7 | -    | 91.0 | 90.7 | 86.3 | 91.5 | 90.7 | 88.5 | 88.3 | 91.2 | 88.0 | 79.7 | 82.0 | 91.6 | 84.8 | 88.7  | 88.9 | 86.8 | 84.7 | 91.4 | 84.1 |
| CB   | 83.7 | 92.1 | -    | 95.4 | 85.7 | 90.6 | 96.0 | 91.3 | 94.2 | 96.3 | 93.2 | 80.9 | 81.6 | 91.4 | 84.6 | 93.6  | 92.7 | 84.8 | 86.0 | 93.3 | 82.0 |
| CBe  | 83.7 | 92.3 | 95.9 | -    | 85.4 | 91.3 | 98.8 | 93.1 | 93.3 | 97.1 | 94.0 | 82.9 | 84.4 | 91.1 | 85.2 | 94.0  | 92.7 | 84.6 | 85.5 | 92.5 | 83.9 |
| CBi  | 83.3 | 85.7 | 85.7 | 85.9 | -    | 86.3 | 85.0 | 84.7 | 85.8 | 83.4 | 85.7 | 82.9 | 84.5 | 83.9 | 94.1 | 86.1  | 85.2 | 97.0 | 94.3 | 84.6 | 94.7 |
| CBo  | 81.0 | 93.2 | 91.3 | 92.1 | 84.8 | -    | 91.3 | 88.8 | 88.7 | 88.2 | 88.3 | 79.5 | 81.4 | 93.4 | 84.6 | 87.2  | 88.5 | 87.3 | 87.0 | 91.4 | 84.3 |
| CBu  | 82.7 | 92.1 | 94.9 | 98.2 | 84.8 | 92.0 | -    | 93.1 | 93.1 | 96.6 | 93.8 | 82.9 | 84.4 | 91.3 | 84.6 | 93.8  | 93.5 | 84.2 | 85.1 | 93.5 | 83.2 |
| CC   | 82.3 | 90.6 | 91.5 | 92.3 | 83.4 | 90.2 | 92.1 | -    | 91.9 | 94.6 | 92.9 | 82.2 | 82.2 | 88.5 | 85.1 | 92.7  | 92.8 | 84.5 | 85.2 | 91.4 | 82.2 |
| CCr  | 83.5 | 91.0 | 95.9 | 95.3 | 85.5 | 90.4 | 94.8 | 91.9 | -    | 95.8 | 98.6 | 81.5 | 82.0 | 90.0 | 85.8 | 95.0  | 91.2 | 85.8 | 85.5 | 90.8 | 84.8 |
| CCe  | 85.6 | 92.1 | 95.6 | 95.6 | 84.8 | 89.9 | 94.7 | 92.8 | 96.4 | -    | 96.1 | 81.1 | 81.8 | 90.2 | 83.5 | 100.0 | 95.3 | 82.9 | 85.8 | 93.1 | 84.5 |
| CCh  | 83.1 | 91.6 | 95.3 | 94.8 | 85.3 | 90.6 | 94.4 | 92.0 | 98.2 | 95.8 | -    | 80.9 | 82.2 | 89.8 | 85.6 | 94.6  | 90.8 | 86.0 | 85.5 | 91.0 | 84.3 |
| CCl  | 90.5 | 83.2 | 82.8 | 83.8 | 83.2 | 82.4 | 83.1 | 82.5 | 83.1 | 83.5 | 82.8 | -    | 90.6 | 79.6 | 82.5 | 80.7  | 80.1 | 82.3 | 84.2 | 79.2 | 81.5 |
| CCo  | 89.7 | 83.9 | 82.1 | 84.3 | 84.1 | 83.0 | 83.4 | 82.9 | 82.7 | 83.6 | 82.0 | 92.6 | -    | 80.8 | 83.0 | 82.3  | 82.7 | 83.5 | 84.6 | 81.2 | 80.5 |
| CCm  | 82.1 | 92.9 | 90.7 | 91.2 | 84.5 | 92.8 | 90.9 | 88.9 | 90.5 | 91.2 | 90.8 | 81.9 | 82.9 | -    | 82.7 | 87.6  | 86.8 | 84.0 | 84.4 | 91.8 | 80.6 |
| CD   | 83.6 | 85.6 | 85.5 | 85.0 | 94.8 | 84.6 | 83.6 | 83.0 | 85.6 | 85.1 | 85.6 | 83.2 | 83.7 | 83.8 | -    | 85.0  | 85.2 | 94.9 | 93.7 | 85.2 | 93.8 |
| CDi  | 83.6 | 91.5 | 94.7 | 95.2 | 85.1 | 89.8 | 94.8 | 92.3 | 96.5 | 98.9 | 95.8 | 83.1 | 83.4 | 90.1 | 85.0 | -     | 93.3 | 85.2 | 87.7 | 90.2 | 84.8 |
| CF   | 83.3 | 92.0 | 93.3 | 94.3 | 85.4 | 90.7 | 93.8 | 92.4 | 93.7 | 94.6 | 94.4 | 83.4 | 83.1 | 90.8 | 85.3 | 94.0  | -    | 86.0 | 85.7 | 92.3 | 83.6 |
| CG   | 83.1 | 86.7 | 85.8 | 85.8 | 97.7 | 85.3 | 84.6 | 83.2 | 85.7 | 85.0 | 85.9 | 83.4 | 84.5 | 84.3 | 95.4 | 85.3  | 85.4 | -    | 93.9 | 84.3 | 95.2 |
| CGly | 84.0 | 84.7 | 84.9 | 84.9 | 95.0 | 85.2 | 83.9 | 82.6 | 84.6 | 85.0 | 84.3 | 83.5 | 84.2 | 83.8 | 94.4 | 84.8  | 85.4 | 94.3 | -    | 85.3 | 92.4 |
| CH   | 81.7 | 92.1 | 91.5 | 92.3 | 85.8 | 91.0 | 92.1 | 89.5 | 91.2 | 91.6 | 91.4 | 82.2 | 82.4 | 91.3 | 85.5 | 90.5  | 93.2 | 85.8 | 85.6 | -    | 82.3 |
| CHr  | 84.6 | 85.1 | 83.4 | 84.3 | 92.8 | 84.5 | 82.7 | 81.4 | 84.4 | 84.8 | 84.1 | 82.9 | 82.6 | 83.0 | 94.2 | 84.3  | 84.6 | 93.6 | 93.6 | 84.2 | -    |
| CHi  | 82.6 | 91.5 | 90.9 | 91.7 | 85.1 | 92.6 | 91.0 | 90.6 | 89.6 | 91.1 | 90.0 | 82.3 | 83.0 | 90.7 | 85.4 | 89.6  | 91.8 | 84.9 | 85.1 | 91.0 | 84.5 |
| CHy  | 89.1 | 80.4 | 80.3 | 80.3 | 81.9 | 79.6 | 80.7 | 79.2 | 80.5 | 82.5 | 80.8 | 91.7 | 90.6 | 78.9 | 81.8 | 80.3  | 82.6 | 81.5 | 83.1 | 80.5 | 83.4 |
| CI   | 90.5 | 82.8 | 82.6 | 83.4 | 85.1 | 81.9 | 82.7 | 82.6 | 82.9 | 83.8 | 82.9 | 91.1 | 90.6 | 82.1 | 84.1 | 82.9  | 83.5 | 84.6 | 85.1 | 83.0 | 84.4 |
| CIn  | 80.3 | 80.7 | 79.9 | 79.7 | 80.7 | 80.2 | 79.7 | 79.3 | 79.8 | 80.0 | 79.6 | 80.6 | 80.9 | 79.2 | 81.0 | 79.4  | 80.0 | 80.8 | 79.9 | 79.2 | 80.9 |
| CL   | 82.2 | 91.9 | 91.1 | 92.2 | 84.9 | 93.2 | 91.8 | 91.2 | 90.4 | 91.3 | 90.5 | 82.7 | 83.3 | 91.3 | 85.6 | 89.9  | 91.9 | 85.1 | 84.8 | 91.1 | 84.1 |
| CM   | 82.0 | 92.7 | 90.9 | 90.8 | 84.6 | 91.9 | 90.5 | 89.3 | 91.0 | 91.7 | 91.1 | 82.1 | 82.1 | 93.9 | 84.9 | 91.4  | 90.7 | 85.0 | 83.3 | 90.6 | 82.3 |
| CMg  | 82.7 | 85.0 | 85.3 | 85.7 | 93.3 | 84.1 | 84.3 | 82.6 | 85.6 | 85.0 | 85.5 | 82.8 | 83.8 | 83.9 | 94.7 | 85.0  | 84.4 | 93.3 | 92.9 | 85.6 | 92.7 |
| CN   | 82.0 | 92.4 | 90.8 | 91.9 | 85.5 | 90.9 | 92.0 | 89.5 | 90.9 | 91.5 | 91.0 | 82.4 | 83.0 | 91.1 | 85.3 | 90.3  | 92.7 | 85.6 | 85.2 | 98.7 | 84.1 |
| CP   | 82.8 | 92.5 | 96.1 | 96.3 | 85.0 | 91.5 | 95.9 | 92.3 | 96.3 | 96.1 | 95.4 | 83.1 | 83.0 | 90.5 | 85.2 | 95.9  | 93.9 | 85.8 | 84.4 | 91.5 | 84.1 |
| CPf  | 82.7 | 91.9 | 95.3 | 94.3 | 86.3 | 91.4 | 93.7 | 89.8 | 93.7 | 93.0 | 93.6 | 83.4 | 83.7 | 90.7 | 86.2 | 92.3  | 93.4 | 87.1 | 85.3 | 91.9 | 84.8 |
| CR   | 80.2 | 81.8 | 80.8 | 81.8 | 81.7 | 81.3 | 82.0 | 80.2 | 81.2 | 81.8 | 81.7 | 81.5 | 82.5 | 80.7 | 81.0 | 81.2  | 81.3 | 81.0 | 80.0 | 81.6 | 80.7 |
| CS   | 83.4 | 91.6 | 95.4 | 94.7 | 85.5 | 90.5 | 94.2 | 91.7 | 98.3 | 95.9 | 99.2 | 82.9 | 82.3 | 90.3 | 85.8 | 95.9  | 94.8 | 85.9 | 84.4 | 91.5 | 84.5 |
| CSo  | 83.7 | 86.1 | 85.5 | 85.7 | 97.7 | 85.7 | 84.4 | 82.9 | 85.6 | 85.1 | 85.6 | 83.5 | 84.3 | 84.1 | 95.2 | 84.9  | 85.1 | 98.9 | 94.7 | 85.0 | 94.3 |
| CSh  | 91.7 | 84.2 | 84.4 | 84.6 | 84.7 | 83.3 | 84.5 | 83.3 | 83.8 | 84.8 | 83.9 | 93.1 | 92.5 | 83.5 | 84.8 | 84.0  | 84.4 | 84.9 | 85.6 | 83.6 | 83.8 |
| CSi  | 79.2 | 82.4 | 81.4 | 81.6 | 81.0 | 81.7 | 81.8 | 80.0 | 81.5 | 81.8 | 81.9 | 80.9 | 81.6 | 80.9 | 81.1 | 81.5  | 81.6 | 81.2 | 80.1 | 81.4 | 80.0 |
| CSp  | 81.3 | 93.7 | 91.7 | 92.4 | 84.8 | 99.7 | 92.3 | 90.2 | 90.3 | 90.2 | 90.8 | 82.5 | 83.1 | 93.1 | 84.4 | 90.0  | 90.9 | 85.6 | 84.7 | 91.6 | 84.0 |
| CSs  | 82.3 | 82.8 | 81.9 | 82.5 | 81.6 | 82.9 | 82.5 | 81.6 | 82.2 | 82.2 | 82.2 | 81.7 | 81.9 | 81.5 | 81.8 | 81.9  | 82.2 | 81.7 | 81.1 | 82.7 | 82.4 |
| CSu  | 82.8 | 99.3 | 91.9 | 92.1 | 85.7 | 93.1 | 91.9 | 90.5 | 90.7 | 91.8 | 91.2 | 82.9 | 83.6 | 92.5 | 85.5 | 91.3  | 92.3 | 86.6 | 84.7 | 92.2 | 84.9 |
| CSy  | 90.2 | 82.8 | 82.9 | 83.3 | 83.4 | 82.8 | 83.1 | 82.2 | 83.4 | 83.0 | 83.4 | 93.7 | 91.2 | 82.3 | 83.7 | 82.9  | 83.3 | 84.3 | 84.2 | 82.4 | 82.8 |
| CT   | 83.6 | 91.0 | 95.6 | 95.8 | 85.7 | 90.3 | 94.9 | 92.3 | 98.7 | 96.3 | 98.0 | 83.1 | 82.8 | 90.7 | 85.6 | 96.2  | 94.2 | 86.1 | 84.9 | 91.7 | 84.2 |
| CTe  | 81.7 | 92.9 | 91.2 | 91.6 | 84.3 | 92.7 | 91.3 | 89.1 | 90.6 | 91.2 | 90.8 | 81.8 | 83.1 | 98.5 | 84.1 | 90.3  | 90.9 | 85.0 | 84.1 | 91.7 | 83.2 |

|      | CHi  | CHy  | CI   | CIn  | CL   | CM   | CMg  | CN   | CP   | CPf  | CR   | CS   | CSo  | CSh  | CSi  | CSp  | CSs  | CSu  | CSy  | CT   | CTe  |
|------|------|------|------|------|------|------|------|------|------|------|------|------|------|------|------|------|------|------|------|------|------|
| CA   | 80.1 | 87.5 | 89.8 | 78.0 | 78.9 | 77.1 | 77.5 | 78.7 | 78.9 | 78.1 | 75.2 | 81.4 | 79.1 | 92.5 | 73.6 | 77.3 | 81.8 | 78.8 | 90.4 | 80.6 | 77.2 |
| CAR  | 90.1 | 72.3 | 79.4 | 80.8 | 90.8 | 90.8 | 83.9 | 91.6 | 91.3 | 90.8 | 79.5 | 88.0 | 86.3 | 82.5 | 80.6 | 92.4 | 80.8 | 98.8 | 80.0 | 87.6 | 91.2 |
| CB   | 93.2 | 74.6 | 80.6 | 80.3 | 92.8 | 90.2 | 84.4 | 92.4 | 96.6 | 94.2 | 77.7 | 93.2 | 85.1 | 84.3 | 79.2 | 91.6 | 83.7 | 90.6 | 82.5 | 92.7 | 91.2 |
| CBe  | 93.6 | 75.4 | 81.3 | 80.6 | 95.2 | 89.8 | 85.2 | 92.6 | 95.2 | 92.9 | 79.7 | 93.4 | 85.9 | 85.7 | 79.4 | 92.1 | 82.5 | 90.5 | 82.8 | 93.5 | 91.1 |
| CBi  | 84.4 | 77.2 | 84.1 | 80.7 | 83.7 | 84.4 | 92.0 | 84.9 | 85.2 | 85.0 | 80.3 | 86.1 | 97.2 | 85.4 | 79.4 | 86.5 | 80.9 | 86.5 | 86.4 | 85.6 | 83.3 |
| CBo  | 90.7 | 72.0 | 78.6 | 80.0 | 93.4 | 90.4 | 84.1 | 91.2 | 89.9 | 89.7 | 79.0 | 87.1 | 86.5 | 82.5 | 78.7 | 99.0 | 79.0 | 91.1 | 81.0 | 87.7 | 92.9 |
| CBu  | 93.4 | 75.6 | 81.5 | 80.8 | 95.4 | 89.8 | 84.8 | 93.6 | 95.4 | 93.5 | 80.3 | 93.2 | 85.3 | 86.1 | 80.0 | 92.1 | 83.5 | 90.5 | 83.6 | 93.1 | 90.9 |
| CC   | 92.2 | 75.1 | 81.2 | 78.2 | 94.2 | 87.8 | 84.4 | 91.1 | 92.7 | 89.0 | 81.0 | 91.5 | 84.6 | 83.7 | 80.5 | 89.5 | 84.3 | 88.7 | 82.8 | 93.3 | 88.6 |
| CCr  | 90.6 | 75.7 | 81.9 | 80.2 | 91.2 | 89.2 | 85.4 | 89.7 | 96.0 | 91.5 | 79.6 | 98.2 | 85.3 | 83.6 | 79.9 | 89.3 | 83.1 | 87.7 | 83.9 | 97.7 | 89.9 |
| CCe  | 94.4 | 81.9 | 81.4 | 79.2 | 93.9 | 90.1 | 83.1 | 91.9 | 97.5 | 92.4 | 79.0 | 96.8 | 83.7 | 83.5 | 79.4 | 89.2 | 83.0 | 90.9 | 81.5 | 95.6 | 90.2 |
| CCh  | 90.8 | 76.3 | 81.2 | 79.3 | 91.6 | 89.2 | 86.0 | 90.2 | 95.4 | 90.6 | 79.5 | 98.4 | 86.1 | 84.1 | 79.2 | 88.9 | 83.3 | 87.6 | 83.6 | 98.1 | 89.6 |
| CCl  | 80.7 | 90.4 | 91.2 | 79.2 | 81.8 | 79.5 | 81.9 | 80.3 | 80.4 | 80.8 | 79.5 | 80.9 | 83.1 | 92.8 | 77.9 | 80.3 | 79.6 | 79.4 | 93.4 | 80.6 | 79.4 |
| CCo  | 81.7 | 89.2 | 91.1 | 80.2 | 83.3 | 79.9 | 83.1 | 81.8 | 82.3 | 83.4 | 81.6 | 82.2 | 82.6 | 92.1 | 80.2 | 82.2 | 80.1 | 81.8 | 90.6 | 81.7 | 81.1 |
| CCm  | 89.6 | 72.7 | 77.9 | 77.1 | 91.6 | 93.5 | 83.3 | 91.8 | 90.3 | 90.5 | 76.8 | 88.8 | 83.9 | 82.9 | 77.5 | 94.2 | 79.6 | 90.8 | 80.7 | 89.4 | 99.0 |
| CD   | 85.5 | 74.8 | 82.0 | 80.8 | 85.2 | 85.3 | 94.5 | 85.3 | 85.2 | 84.7 | 76.7 | 85.4 | 94.6 | 82.7 | 77.8 | 84.4 | 80.8 | 84.8 | 85.2 | 84.9 | 82.9 |
| CDi  | 91.1 | 74.9 | 80.7 | 78.3 | 90.7 | 90.3 | 84.1 | 89.1 | 95.9 | 89.3 | 77.6 | 95.5 | 85.2 | 83.2 | 79.0 | 87.8 | 82.3 | 88.9 | 81.5 | 94.2 | 87.8 |
| CF   | 92.9 | 81.0 | 80.5 | 79.6 | 93.9 | 87.5 | 81.9 | 92.1 | 92.5 | 90.8 | 78.0 | 92.1 | 84.4 | 83.4 | 78.5 | 89.3 | 81.3 | 89.4 | 81.1 | 92.5 | 86.8 |
| CG   | 83.6 | 74.4 | 82.4 | 81.4 | 84.4 | 85.4 | 92.4 | 84.7 | 85.2 | 86.4 | 78.6 | 85.6 | 98.1 | 84.0 | 78.7 | 87.3 | 80.1 | 86.6 | 85.8 | 85.7 | 84.1 |
| CGly | 85.1 | 78.7 | 83.4 | 78.9 | 84.6 | 84.0 | 91.3 | 84.9 | 85.3 | 84.4 | 76.4 | 84.9 | 94.3 | 85.5 | 76.9 | 86.8 | 79.7 | 84.7 | 86.3 | 85.3 | 84.2 |
| CH   | 94.6 | 75.3 | 78.8 | 78.4 | 94.8 | 90.9 | 85.0 | 98.3 | 92.0 | 92.1 | 78.8 | 90.6 | 83.5 | 82.6 | 78.4 | 92.2 | 82.0 | 91.0 | 80.6 | 91.6 | 92.1 |
| CHr  | 82.7 | 79.0 | 82.4 | 79.1 | 82.2 | 81.8 | 91.0 | 81.6 | 83.2 | 83.6 | 76.9 | 84.8 | 96.3 | 81.9 | 75.4 | 84.1 | 81.6 | 84.3 | 81.9 | 84.1 | 80.9 |
| CHi  | -    | 74.4 | 80.3 | 81.1 | 96.7 | 90.1 | 85.1 | 94.3 | 92.0 | 91.2 | 80.9 | 90.1 | 85.0 | 83.5 | 80.0 | 91.4 | 82.0 | 90.1 | 81.1 | 90.4 | 89.7 |
| CHy  | 80.5 | -    | 88.2 | 71.6 | 73.7 | 71.5 | 74.8 | 73.1 | 74.2 | 71.3 | 74.2 | 76.1 | 76.0 | 90.4 | 72.3 | 72.8 | 80.0 | 72.9 | 90.6 | 76.5 | 72.4 |
| CI   | 83.0 | 90.3 | -    | 80.4 | 80.2 | 79.0 | 82.7 | 78.9 | 80.9 | 80.6 | 82.0 | 81.6 | 83.3 | 90.4 | 80.9 | 79.4 | 80.0 | 79.7 | 91.6 | 80.8 | 78.0 |
| CIn  | 80.8 | 79.0 | 81.8 | -    | 80.5 | 77.6 | 75.7 | 79.3 | 79.4 | 80.4 | 82.6 | 80.1 | 80.5 | 81.6 | 83.6 | 80.6 | 76.5 | 80.4 | 79.3 | 78.5 | 77.8 |
| CL   | 97.2 | 80.2 | 83.0 | 80.4 | -    | 90.7 | 83.4 | 94.5 | 93.2 | 91.5 | 81.5 | 90.4 | 83.9 | 85.1 | 80.4 | 94.0 | 82.2 | 90.4 | 82.3 | 91.7 | 91.8 |
| CM   | 90.1 | 78.9 | 81.1 | 78.5 | 90.7 | -    | 83.2 | 89.6 | 90.2 | 90.0 | 78.4 | 88.2 | 85.3 | 82.6 | 77.7 | 91.2 | 81.0 | 90.4 | 80.2 | 89.0 | 93.9 |
| CMg  | 85.5 | 81.5 | 84.2 | 79.5 | 84.2 | 84.1 | -    | 87.0 | 83.9 | 84.9 | 75.7 | 86.0 | 93.2 | 84.7 | 78.0 | 84.4 | 78.9 | 84.1 | 84.8 | 85.7 | 83.2 |
| CN   | 91.1 | 79.6 | 82.7 | 79.7 | 90.9 | 90.1 | 86.1 | -    | 91.4 | 91.8 | 80.1 | 89.8 | 84.1 | 83.5 | 80.2 | 92.2 | 81.3 | 91.2 | 80.4 | 90.5 | 91.6 |
| CP   | 90.8 | 80.7 | 82.6 | 79.7 | 91.4 | 90.9 | 84.9 | 91.0 | -    | 93.5 | 79.9 | 94.4 | 85.1 | 83.0 | 80.5 | 90.7 | 82.7 | 91.1 | 82.2 | 95.4 | 90.5 |
| CPf  | 90.9 | 79.2 | 82.4 | 80.0 | 91.5 | 90.9 | 86.2 | 91.3 | 94.1 | -    | 78.6 | 90.2 | 84.8 | 84.6 | 78.3 | 90.5 | 82.2 | 90.4 | 81.4 | 90.5 | 90.8 |
| CR   | 82.7 | 80.7 | 83.0 | 84.2 | 82.8 | 80.2 | 81.4 | 81.7 | 81.9 | 81.8 | -    | 79.3 | 77.9 | 80.9 | 94.9 | 79.0 | 77.8 | 79.7 | 80.4 | 79.6 | 77.0 |
| CS   | 90.0 | 81.0 | 82.7 | 80.2 | 90.3 | 90.8 | 85.7 | 91.0 | 95.3 | 93.5 | 81.5 | -    | 86.1 | 83.9 | 79.2 | 88.1 | 81.6 | 88.0 | 83.4 | 97.3 | 88.6 |
| CSo  | 85.4 | 81.4 | 84.9 | 80.3 | 84.8 | 84.8 | 93.8 | 85.1 | 85.3 | 86.4 | 80.8 | 85.9 | -    | 84.4 | 78.0 | 86.7 | 80.5 | 86.5 | 85.5 | 85.6 | 83.1 |
| CSh  | 84.0 | 91.7 | 91.0 | 82.1 | 84.4 | 83.5 | 84.5 | 84.2 | 84.2 | 84.8 | 82.9 | 84.0 | 85.0 | -    | 80.2 | 83.5 | 80.0 | 82.3 | 93.2 | 83.5 | 82.4 |
| CSi  | 82.5 | 79.9 | 82.5 | 85.0 | 82.5 | 80.2 | 80.8 | 81.8 | 82.0 | 82.1 | 96.1 | 81.6 | 80.8 | 83.4 | -    | 78.7 | 76.3 | 80.6 | 80.3 | 79.3 | 76.9 |
| CSp  | 92.7 | 80.1 | 82.2 | 80.4 | 93.3 | 92.2 | 84.0 | 91.2 | 91.7 | 91.9 | 81.5 | 90.9 | 85.5 | 83.7 | 82.0 | -    | 79.8 | 92.0 | 81.7 | 88.8 | 93.8 |
| CSs  | 82.5 | 82.2 | 82.4 | 79.7 | 82.3 | 81.5 | 80.9 | 82.6 | 82.4 | 82.0 | 80.8 | 81.9 | 81.5 | 83.6 | 80.7 | 83.1 | -    | 80.0 | 78.7 | 82.8 | 79.8 |
| CSu  | 91.5 | 80.2 | 82.7 | 80.3 | 91.7 | 92.5 | 84.9 | 92.3 | 92.5 | 91.9 | 81.7 | 91.4 | 86.4 | 84.1 | 82.2 | 93.7 | 82.7 | -    | 80.5 | 87.1 | 90.4 |
| CSy  | 82.5 | 90.9 | 90.6 | 80.5 | 83.1 | 82.1 | 83.5 | 82.2 | 83.4 | 83.6 | 81.5 | 83.3 | 84.2 | 93.0 | 81.3 | 82.8 | 81.1 | 82.6 | -    | 83.3 | 80.8 |
| CT   | 89.8 | 81.0 | 82.9 | 79.3 | 90.6 | 91.0 | 85.7 | 91.1 | 96.3 | 93.8 | 81.8 | 97.8 | 85.8 | 83.9 | 81.7 | 90.6 | 81.9 | 90.7 | 83.5 | -    | 89.4 |
| CTe  | 90.7 | 79.2 | 81.6 | 79.2 | 91.4 | 93.9 | 84.1 | 91.3 | 91.1 | 91.2 | 81.1 | 90.6 | 84.1 | 83.6 | 80.8 | 93.2 | 81.9 | 92.7 | 82.1 | 90.9 | -    |

The percentage similarities between the full 16S rRNA gene sequences of the species are indicated in the lower left triangle, the percentage differences between the 5' end 527-bp 16S rRNA gene sequences of the species are indicated in the upper right triangle. Percentage similarities of >97% were highlighted in gray.

Abbreviations: CA, *Clostridium aminovalericum*; CAR, *Clostridium argentinense*; CB, *Clostridium baratii*; CBe, *Clostridium beijerinckii*; CBi, *Clostridium bifermentans*; CBo, *Clostridium botulinum*; CBu, *Clostridium butyricum*; CC, *Clostridium cadaveris*; CCr, *Clostridium carnis*; CCe, *Clostridium celatum*; CCh, *Clostridium chauvoei*; CCl, *Clostridium clostridioforme*; CCo, *Clostridium coccooides*; CCm, *Clostridium cochlearium*; CD, *Clostridium difficile*; CDi, *Clostridium disporicum*; CF, *Clostridium fallax*; CG, *Clostridium ghonii*; CGly, *Clostridium glycolicum*; CH, *Clostridium haemolyticum*; CHr, *Clostridium hiranonis*; CHi, *Clostridium histolyticum*; CHy, *Clostridium hylemonae*; CI, *Clostridium indolis*; CIn, *Clostridium innocuum*; CL, *Clostridium limosum*; CM, *Clostridium malenominatum*; CMg, *Clostridium mangenotii*; CN, *Clostridium novyi*; CP, *Clostridium paraputrificum*; CPf, *Clostridium perfringens*; CR, *Clostridium ramosum*; CS, *Clostridium septicum*; CSo, *Clostridium sordellii*; CSh, *Clostridium sphenoides*; CSi, *Clostridium spiroforme*; CSp, *Clostridium sporogenes*; CSs, *Clostridium sporosphaeroides*; CSu, *Clostridium subterminale*; CSy, *Clostridium symbiosum*; CT, *Clostridium tertium*; CTe, *Clostridium tetani*.

**Supplementary Table 1b** Comparison of 16S rRNA gene sequences of medically important *Propionibacterium*, *Pseudoramibacter*, *Bifidobacterium*, *Mobiluncus*, *Collinsella*, *Mogibacterium*, *Atopobium*, *Olsenella* and *Lactobacillus* species

|     | PA   | PAv  | PG   | PP   | PAI  | BAd  | BB   | BBr  | BC   | BD   | BI   | BL   | BG   | MCC  | MCH   | MM   | CA   |
|-----|------|------|------|------|------|------|------|------|------|------|------|------|------|------|-------|------|------|
| PA  | -    | 94.0 | 92.0 | 89.4 | 74.7 | 79.3 | 81.3 | 80.7 | 78.4 | 79.0 | 80.7 | 80.2 | 80.5 | 83.0 | 83.3  | 82.9 | 77.0 |
| PAv | 96.3 | -    | 93.4 | 88.6 | 76.8 | 81.2 | 83.3 | 82.5 | 80.9 | 80.5 | 82.3 | 80.7 | 81.5 | 82.2 | 82.6  | 82.6 | 78.0 |
| PG  | 94.5 | 95.1 | -    | 90.8 | 74.9 | 79.6 | 81.4 | 81.5 | 79.9 | 79.3 | 80.6 | 80.0 | 79.9 | 81.5 | 81.8  | 82.1 | 78.2 |
| PP  | 93.1 | 93.4 | 93.0 | -    | 76.6 | 79.7 | 82.7 | 81.3 | 80.9 | 80.7 | 81.1 | 82.3 | 82.2 | 82.1 | 82.4  | 82.4 | 78.2 |
| PAI | 76.7 | 78.2 | 77.3 | 78.0 | -    | 72.6 | 75.6 | 74.8 | 72.0 | 74.6 | 76.0 | 74.8 | 73.2 | 71.0 | 71.6  | 72.1 | 73.9 |
| BAd | 83.9 | 84.9 | 84.5 | 84.4 | 76.5 | -    | 91.8 | 91.8 | 92.5 | 96.1 | 92.3 | 92.3 | 90.0 | 77.1 | 77.4  | 79.1 | 77.8 |
| BB  | 83.7 | 84.8 | 84.3 | 84.6 | 77.0 | 94.1 | -    | 93.4 | 91.9 | 91.8 | 93.3 | 92.8 | 91.6 | 82.0 | 82.2  | 82.7 | 76.0 |
| BBr | 83.6 | 84.9 | 84.6 | 84.4 | 77.3 | 94.5 | 95.4 | -    | 92.1 | 91.8 | 94.4 | 94.6 | 92.5 | 79.4 | 79.6  | 80.6 | 79.6 |
| BC  | 83.3 | 84.4 | 84.1 | 84.3 | 76.7 | 95.7 | 95.3 | 95.0 | -    | 93.0 | 91.7 | 91.7 | 91.4 | 78.9 | 79.1  | 79.3 | 78.6 |
| BD  | 83.6 | 84.7 | 84.3 | 84.7 | 77.1 | 96.7 | 95.4 | 94.9 | 97.0 | -    | 93.4 | 92.8 | 91.2 | 77.5 | 77.8  | 78.7 | 79.4 |
| BI  | 83.8 | 84.8 | 84.2 | 84.3 | 77.7 | 94.7 | 95.6 | 97.6 | 95.0 | 95.5 | -    | 98.8 | 89.8 | 78.3 | 78.6  | 80.2 | 79.8 |
| BL  | 83.4 | 84.3 | 83.9 | 84.7 | 77.1 | 94.5 | 95.1 | 97.1 | 95.4 | 95.7 | 99.1 | -    | 89.4 | 77.9 | 78.2  | 79.6 | 79.9 |
| BG  | 83.1 | 83.7 | 83.6 | 83.9 | 76.4 | 92.9 | 93.3 | 94.6 | 93.6 | 93.4 | 93.9 | 93.8 | -    | 81.0 | 81.0  | 80.4 | 76.7 |
| MCC | 85.4 | 85.6 | 85.4 | 85.5 | 75.9 | 82.9 | 84.5 | 83.7 | 83.0 | 83.1 | 83.3 | 83.1 | 84.2 | -    | 100.0 | 97.1 | 72.4 |
| MCH | 85.7 | 85.5 | 85.4 | 85.4 | 76.1 | 82.9 | 84.3 | 83.5 | 83.0 | 82.9 | 83.1 | 82.9 | 84.2 | 99.9 | -     | 97.2 | 72.3 |
| MM  | 85.8 | 86.0 | 86.0 | 85.9 | 76.9 | 84.1 | 85.1 | 83.8 | 83.8 | 83.8 | 83.6 | 83.2 | 84.3 | 97.7 | 97.8  | -    | 72.8 |
| CA  | 78.1 | 78.7 | 78.0 | 78.7 | 75.9 | 79.3 | 78.8 | 79.4 | 79.3 | 79.9 | 79.5 | 79.7 | 79.3 | 76.5 | 76.4  | 76.9 | -    |
| CI  | 78.4 | 79.0 | 79.1 | 79.1 | 76.6 | 80.7 | 80.5 | 80.0 | 80.5 | 80.7 | 80.1 | 80.2 | 79.3 | 76.8 | 76.7  | 77.5 | 93.3 |
| CS  | 78.3 | 78.9 | 78.6 | 78.9 | 77.0 | 80.7 | 80.2 | 80.2 | 80.7 | 80.7 | 80.2 | 80.2 | 79.1 | 77.1 | 77.2  | 78.3 | 93.2 |
| MP  | 77.4 | 77.8 | 77.6 | 78.0 | 81.0 | 76.4 | 76.7 | 76.8 | 76.5 | 77.1 | 76.7 | 76.5 | 75.7 | 76.5 | 76.6  | 76.8 | 75.7 |
| MT  | 76.0 | 77.7 | 76.8 | 77.6 | 81.0 | 76.7 | 76.8 | 77.4 | 76.9 | 76.6 | 77.1 | 76.9 | 76.1 | 75.6 | 75.6  | 75.9 | 75.6 |
| MV  | 77.2 | 78.2 | 77.8 | 78.3 | 80.7 | 76.7 | 76.9 | 77.2 | 76.7 | 77.0 | 77.2 | 76.8 | 76.0 | 76.5 | 76.7  | 77.2 | 75.8 |
| AF  | 79.9 | 81.4 | 80.2 | 81.1 | 78.4 | 78.8 | 79.6 | 78.5 | 78.9 | 79.1 | 78.6 | 78.5 | 78.8 | 77.3 | 77.6  | 78.0 | 85.5 |
| AM  | 81.2 | 82.0 | 81.2 | 82.0 | 79.3 | 79.6 | 80.3 | 79.4 | 79.7 | 79.9 | 79.4 | 79.2 | 79.6 | 78.2 | 78.4  | 79.0 | 86.2 |
| AP  | 81.9 | 83.5 | 82.5 | 83.2 | 79.6 | 81.1 | 80.5 | 80.5 | 80.6 | 80.3 | 80.5 | 80.7 | 80.9 | 79.2 | 79.3  | 79.5 | 86.3 |
| AR  | 81.3 | 82.9 | 82.4 | 83.0 | 79.0 | 79.8 | 80.0 | 79.6 | 79.7 | 79.1 | 79.6 | 79.8 | 80.0 | 78.9 | 79.1  | 79.1 | 85.4 |
| AV  | 80.9 | 82.3 | 81.1 | 82.2 | 79.6 | 80.4 | 80.9 | 80.3 | 80.1 | 79.9 | 80.0 | 80.4 | 81.4 | 78.9 | 79.0  | 79.0 | 87.0 |
| OU  | 80.2 | 81.6 | 80.7 | 81.6 | 79.1 | 80.2 | 80.9 | 80.7 | 79.9 | 80.3 | 79.9 | 79.8 | 80.7 | 78.3 | 78.0  | 78.3 | 89.3 |
| LA  | 78.6 | 79.0 | 78.2 | 78.6 | 80.7 | 77.5 | 77.8 | 77.7 | 77.8 | 78.1 | 78.3 | 79.2 | 77.9 | 77.0 | 77.1  | 77.7 | 76.3 |
| LC  | 79.4 | 79.7 | 79.2 | 79.6 | 81.4 | 79.1 | 79.1 | 79.2 | 79.0 | 78.8 | 79.0 | 79.1 | 77.9 | 78.5 | 78.7  | 78.8 | 75.6 |
| LCa | 76.0 | 74.7 | 74.9 | 74.9 | 79.1 | 76.2 | 75.4 | 75.0 | 76.2 | 75.2 | 75.2 | 75.2 | 75.8 | 75.5 | 76.1  | 75.5 | 76.3 |
| LR  | 79.1 | 79.5 | 78.8 | 79.2 | 81.6 | 78.6 | 79.2 | 78.5 | 78.9 | 78.5 | 78.6 | 78.5 | 77.6 | 78.3 | 78.6  | 78.7 | 72.3 |
| LV  | 77.0 | 76.9 | 76.8 | 76.2 | 79.6 | 76.6 | 76.9 | 77.1 | 75.4 | 76.9 | 77.5 | 76.9 | 76.1 | 76.0 | 76.1  | 75.8 | 76.7 |

|     | CI   | CS   | MP   | MT   | MV   | AF   | AM   | AP   | AR   | AV   | OU   | LA   | LC   | LCa  | LR   | LV   |
|-----|------|------|------|------|------|------|------|------|------|------|------|------|------|------|------|------|
| PA  | 77.5 | 78.2 | 75.3 | 72.9 | 74.7 | 77.0 | 80.0 | 80.2 | 80.1 | 81.9 | 80.8 | 75.9 | 77.8 | 75.1 | 77.7 | 76.2 |
| PAv | 78.7 | 78.8 | 75.3 | 75.7 | 76.2 | 80.1 | 81.5 | 83.4 | 83.1 | 84.9 | 82.8 | 75.3 | 77.8 | 73.5 | 78.3 | 75.5 |
| PG  | 79.3 | 79.4 | 74.5 | 73.5 | 74.9 | 79.1 | 81.3 | 82.9 | 82.3 | 83.1 | 81.9 | 76.2 | 78.0 | 73.6 | 77.3 | 74.4 |
| PP  | 79.3 | 79.0 | 76.6 | 75.2 | 76.8 | 79.5 | 82.0 | 82.8 | 83.7 | 84.7 | 82.8 | 74.5 | 78.1 | 74.7 | 77.9 | 73.8 |
| PAI | 76.0 | 75.8 | 79.3 | 77.7 | 78.0 | 73.5 | 75.9 | 76.8 | 75.4 | 77.5 | 77.2 | 75.7 | 76.5 | 76.5 | 76.9 | 76.1 |
| BAd | 78.8 | 79.2 | 75.4 | 75.5 | 75.9 | 75.5 | 78.4 | 79.1 | 77.7 | 80.4 | 79.4 | 71.8 | 75.7 | 72.4 | 75.1 | 73.3 |
| BB  | 78.5 | 77.4 | 76.3 | 75.9 | 76.2 | 76.0 | 77.8 | 78.7 | 78.5 | 81.0 | 79.8 | 75.6 | 76.6 | 73.3 | 77.8 | 74.8 |
| BBr | 79.1 | 79.3 | 75.7 | 76.9 | 76.5 | 75.8 | 77.9 | 79.6 | 78.4 | 80.3 | 80.7 | 74.7 | 75.7 | 73.3 | 75.0 | 74.6 |
| BC  | 78.7 | 79.0 | 74.8 | 74.7 | 75.6 | 74.8 | 76.9 | 78.5 | 77.8 | 79.4 | 79.0 | 72.5 | 74.9 | 73.0 | 75.1 | 69.9 |
| BD  | 78.9 | 78.9 | 75.3 | 75.4 | 75.9 | 75.6 | 77.1 | 78.0 | 76.1 | 79.1 | 79.0 | 73.3 | 74.8 | 72.7 | 74.9 | 74.4 |
| BI  | 79.7 | 80.0 | 75.5 | 76.3 | 76.3 | 76.2 | 78.2 | 79.4 | 78.0 | 80.2 | 79.2 | 76.4 | 75.3 | 73.5 | 75.4 | 74.6 |
| BL  | 79.6 | 79.9 | 75.1 | 76.5 | 75.1 | 75.8 | 77.9 | 79.8 | 78.8 | 80.2 | 78.5 | 76.6 | 75.8 | 73.9 | 75.4 | 74.3 |
| BG  | 77.0 | 75.3 | 74.5 | 76.0 | 75.0 | 75.2 | 77.6 | 79.4 | 78.1 | 81.5 | 81.0 | 73.5 | 73.7 | 71.6 | 73.7 | 73.4 |
| MCC | 72.5 | 71.6 | 73.1 | 71.7 | 72.6 | 72.8 | 75.9 | 76.4 | 77.1 | 76.3 | 75.0 | 73.0 | 76.2 | 71.9 | 75.8 | 72.8 |
| MCH | 72.8 | 71.9 | 73.4 | 72.1 | 72.9 | 73.1 | 76.2 | 76.7 | 77.3 | 76.6 | 75.3 | 73.6 | 76.5 | 71.9 | 76.2 | 73.2 |
| MM  | 73.7 | 74.1 | 74.1 | 72.1 | 74.2 | 73.2 | 77.0 | 76.3 | 76.6 | 75.8 | 73.8 | 75.9 | 70.8 | 75.6 | 72.8 | 72.8 |
| CA  | 94.4 | 93.7 | 73.9 | 74.0 | 73.3 | 80.6 | 83.0 | 83.1 | 82.3 | 84.0 | 86.5 | 74.4 | 68.3 | 72.2 | 60.2 | 76.9 |
| CI  | -    | 97.5 | 75.1 | 74.5 | 75.0 | 81.6 | 84.1 | 84.5 | 83.5 | 85.0 | 88.1 | 71.1 | 73.5 | 73.5 | 67.3 | 73.1 |
| CS  | 97.4 | -    | 76.1 | 75.1 | 76.0 | 81.4 | 84.0 | 85.0 | 83.3 | 84.4 | 88.5 | 75.2 | 73.6 | 72.9 | 65.2 | 70.9 |
| MP  | 76.8 | 76.4 | -    | 95.1 | 98.8 | 74.8 | 76.5 | 77.8 | 76.0 | 78.6 | 77.0 | 76.7 | 79.8 | 72.4 | 79.9 | 78.6 |
| MT  | 75.4 | 75.5 | 97.0 | -    | 96.0 | 73.5 | 75.2 | 77.9 | 76.0 | 77.4 | 76.4 | 76.2 | 78.5 | 73.1 | 78.4 | 78.6 |
| MV  | 76.5 | 76.0 | 98.5 | 96.9 | -    | 73.7 | 75.8 | 77.9 | 76.5 | 78.7 | 77.1 | 76.6 | 78.6 | 73.9 | 79.4 | 78.1 |
| AF  | 85.8 | 85.3 | 77.8 | 76.8 | 77.3 | -    | 94.0 | 89.7 | 88.1 | 89.2 | 84.6 | 74.4 | 73.2 | 71.3 | 73.1 | 73.6 |
| AM  | 86.1 | 85.9 | 78.3 | 77.5 | 77.9 | 97.1 | -    | 92.5 | 90.5 | 92.6 | 87.6 | 76.4 | 76.5 | 74.4 | 76.7 | 75.3 |
| AP  | 86.2 | 86.1 | 78.6 | 78.5 | 78.5 | 93.3 | 94.1 | -    | 93.4 | 92.7 | 90.9 | 76.5 | 75.5 | 74.2 | 76.1 | 74.7 |
| AR  | 85.4 | 85.4 | 78.4 | 78.1 | 78.4 | 91.9 | 92.5 | 96.4 | -    | 92.7 | 88.8 | 74.7 | 77.5 | 74.9 | 77.7 | 73.4 |
| AV  | 86.9 | 87.0 | 78.4 | 77.9 | 78.4 | 92.1 | 93.5 | 93.3 | 92.7 | -    | 91.3 | 77.6 | 76.6 | 73.3 | 77.0 | 75.4 |
| OU  | 89.5 | 89.5 | 77.8 | 76.9 | 77.8 | 90.6 | 91.7 | 92.5 | 91.3 | 93.5 | -    | 75.8 | 76.4 | 75.5 | 75.6 | 77.1 |
| LA  | 77.2 | 76.7 | 78.9 | 78.7 | 78.8 | 78.2 | 79.3 | 78.9 | 78.1 | 79.1 | 78.5 | -    | 80.4 | 74.3 | 83.3 | 74.0 |
| LC  | 76.5 | 76.8 | 81.0 | 80.4 | 80.3 | 78.8 | 80.3 | 79.3 | 79.6 | 79.1 | 78.8 | 87.5 | -    | 75.1 | 97.0 | 77.4 |
| LCa | 76.2 | 76.2 | 75.6 | 76.0 | 75.9 | 75.9 | 77.9 | 77.8 | 77.1 | 77.8 | 77.9 | 79.4 | 78.7 | -    | 76.8 | 85.2 |
| LR  | 74.1 | 73.7 | 80.8 | 80.3 | 80.5 | 78.5 | 80.2 | 79.3 | 79.5 | 79.0 | 78.2 | 88.4 | 98.6 | 78.7 | -    | 70.7 |
| LV  | 78.0 | 77.4 | 78.3 | 78.6 | 78.1 | 77.2 | 77.8 | 77.2 | 76.5 | 77.5 | 78.6 | 80.1 | 80.9 | 89.4 | 78.4 | -    |

The percentage similarities between the full 16S rRNA gene sequences of the species are indicated in the lower left triangle, the percentage differences between the 5' end 527-bp 16S rRNA gene sequences of the species are indicated in the upper right triangle. Percentage similarities of >97% were highlighted in gray.

Abbreviations: PA, *Propionibacterium acnes*; PAv, *Propionibacterium avidum*; PG, *Propionibacterium granulosum*; PP, *Propionibacterium propionicum*; PAI, *Pseudoramibacter alactolyticus*; BAd, *Bifidobacterium adolescentis*; BB, *Bifidobacterium bifidum*; BBr, *Bifidobacterium breve*; BC, *Bifidobacterium catenulatum*; BD, *Bifidobacterium dentium*; BI, *Bifidobacterium infantis*; BL, *Bifidobacterium longum*; BG, *Bifidobacterium globosum*; MCC, *Mobiluncus curtisii* subsp. *curtisii*; MCH, *Mobiluncus curtisii* subsp. *holmesii*; MM, *Mobiluncus mulieris*; CA, *Collinsella aerofaciens*; CI, *Collinsella intestinalis*; CS, *Collinsella stercoris*; MP, *Mogibacterium pumilum*; MT, *Mogibacterium timidum*; MV, *Mogibacterium vesicum*; AF, *Atopobium fossor*; AM, *Atopobium minutum*; AP, *Atopobium parvulum*; AR, *Atopobium rimae*; AV, *Atopobium vaginae*; OU, *Olsenella uli*; LA, *Lactobacillus acidophilus*; LC, *Lactobacillus casei*; LCa, *Lactobacillus cateniformis*; LR, *Lactobacillus rhamnosus*; LV, *Lactobacillus vitulinus*.

**Supplementary Table 1c** Comparison of 16S rRNA gene sequences of medically important *Eubacterium*, *Eggerthella*, *Bulleidia*, *Catenibacterium*, *Cryptobacterium*, *Holdemania* and *Slackia* species

|     | EB   | EBu  | ES   | EC   | ECt  | EI   | EM   | EMo  | EMu  | EN   | ENo  | ESa  | ESu  | ET   | EYM  | EYS  | EYY  | BE   | CM   | CC   | EL   | HF   | SE   | SH   |
|-----|------|------|------|------|------|------|------|------|------|------|------|------|------|------|------|------|------|------|------|------|------|------|------|------|
| EB  | -    | 81.9 | 78.8 | 82.1 | 81.9 | 86.9 | 83.4 | 82.7 | 81.4 | 81.9 | 81.5 | 84.0 | 84.9 | 86.0 | 79.5 | 79.6 | 79.0 | 76.3 | 72.7 | 72.8 | 73.5 | 75.4 | 71.7 | 73.7 |
| EBu | 82.1 | -    | 80.2 | 90.5 | 84.2 | 83.4 | 80.7 | 97.2 | 97.0 | 99.6 | 79.3 | 83.1 | 83.2 | 84.8 | 77.3 | 71.3 | 78.3 | 76.7 | 79.2 | 72.7 | 75.6 | 74.3 | 73.3 | 74.9 |
| ES  | 81.1 | 81.6 | -    | 79.6 | 89.7 | 78.8 | 80.9 | 80.0 | 79.7 | 80.2 | 80.1 | 78.0 | 76.0 | 81.2 | 78.5 | 76.1 | 78.6 | 74.0 | 79.6 | 75.9 | 75.5 | 74.9 | 75.4 | 76.9 |
| EC  | 82.8 | 90.8 | 81.4 | -    | 82.2 | 84.0 | 80.7 | 90.9 | 90.3 | 90.7 | 79.7 | 82.9 | 82.8 | 86.2 | 75.0 | 71.4 | 75.3 | 76.8 | 79.7 | 72.2 | 74.6 | 76.0 | 73.3 | 74.3 |
| ECt | 82.7 | 84.1 | 89.7 | 83.9 | -    | 81.4 | 81.5 | 83.2 | 83.1 | 84.3 | 79.3 | 80.4 | 80.5 | 84.1 | 77.7 | 77.2 | 78.3 | 73.9 | 79.6 | 76.2 | 76.8 | 75.1 | 74.2 | 76.4 |
| EI  | 89.6 | 83.6 | 81.2 | 83.0 | 82.2 | -    | 86.4 | 83.5 | 81.6 | 82.9 | 86.2 | 87.0 | 98.0 | 86.2 | 77.3 | 78.6 | 78.8 | 76.3 | 79.2 | 74.7 | 74.5 | 74.6 | 73.8 | 74.6 |
| EM  | 85.9 | 80.9 | 81.4 | 81.0 | 81.8 | 88.8 | -    | 82.5 | 81.9 | 80.8 | 91.1 | 85.8 | 85.9 | 84.4 | 78.5 | 72.9 | 77.9 | 75.3 | 79.0 | 73.2 | 74.1 | 74.6 | 72.9 | 74.4 |
| EMo | 82.5 | 98.0 | 81.0 | 91.0 | 83.7 | 82.6 | 80.5 | -    | 98.8 | 97.0 | 81.7 | 84.3 | 82.9 | 86.5 | 77.6 | 72.1 | 79.6 | 75.3 | 78.5 | 72.6 | 76.3 | 75.6 | 73.0 | 74.0 |
| EMu | 81.7 | 97.8 | 81.4 | 90.5 | 83.5 | 83.1 | 81.6 | 99.2 | -    | 96.6 | 80.9 | 83.1 | 81.6 | 85.8 | 78.4 | 73.0 | 79.4 | 77.3 | 77.7 | 71.4 | 75.5 | 75.2 | 72.8 | 73.4 |
| EN  | 81.5 | 99.0 | 81.8 | 90.7 | 84.3 | 82.2 | 80.1 | 97.6 | 97.7 | -    | 78.9 | 82.7 | 82.3 | 85.0 | 77.4 | 71.5 | 78.0 | 76.4 | 78.6 | 72.3 | 74.9 | 74.2 | 72.6 | 74.5 |
| ENo | 85.5 | 80.3 | 81.0 | 81.7 | 82.0 | 88.3 | 94.6 | 81.1 | 81.1 | 80.3 | -    | 83.5 | 86.4 | 84.8 | 77.0 | 78.8 | 76.7 | 73.4 | 78.9 | 72.0 | 73.1 | 73.7 | 72.4 | 72.6 |
| ESa | 89.1 | 84.5 | 81.5 | 84.3 | 82.5 | 89.8 | 88.6 | 84.9 | 84.1 | 84.4 | 86.6 | -    | 86.5 | 79.7 | 78.5 | 78.6 | 78.0 | 74.9 | 77.0 | 74.4 | 74.5 | 73.3 | 73.4 | 74.9 |
| ESu | 89.0 | 83.5 | 80.0 | 82.7 | 82.3 | 98.8 | 88.3 | 82.3 | 82.5 | 82.6 | 88.6 | 89.5 | -    | 80.2 | 77.0 | 78.5 | 78.4 | 75.5 | 71.3 | 72.7 | 73.1 | 74.9 | 72.4 | 73.7 |
| ET  | 86.9 | 85.2 | 82.7 | 85.0 | 84.8 | 87.7 | 85.1 | 85.6 | 85.7 | 85.2 | 84.6 | 85.2 | 85.3 | -    | 82.8 | 77.1 | 83.8 | 77.1 | 80.8 | 76.8 | 76.5 | 77.7 | 75.2 | 75.8 |
| EYM | 82.3 | 80.7 | 80.9 | 79.6 | 81.3 | 80.5 | 81.0 | 80.5 | 80.8 | 80.4 | 80.4 | 82.1 | 80.3 | 82.4 | -    | 94.0 | 99.2 | 75.6 | 76.3 | 72.2 | 72.4 | 75.2 | 72.5 | 73.4 |
| EYS | 82.3 | 80.5 | 80.2 | 79.8 | 81.2 | 81.1 | 80.8 | 78.4 | 80.8 | 80.2 | 81.1 | 82.2 | 80.9 | 80.3 | 97.9 | -    | 88.1 | 69.6 | 70.3 | 65.8 | 65.3 | 75.2 | 72.4 | 66.9 |
| EYY | 81.6 | 80.9 | 80.7 | 79.9 | 81.3 | 81.1 | 80.6 | 81.2 | 81.0 | 80.4 | 80.1 | 81.6 | 80.8 | 82.7 | 99.4 | 97.4 | -    | 75.9 | 77.2 | 72.6 | 73.4 | 74.3 | 72.6 | 73.3 |
| BE  | 79.0 | 79.1 | 79.4 | 79.8 | 79.4 | 80.2 | 78.4 | 78.4 | 79.5 | 79.1 | 77.5 | 79.8 | 79.9 | 79.6 | 77.5 | 77.3 | 77.4 | -    | 80.3 | 71.9 | 74.0 | 85.2 | 73.4 | 75.2 |
| CM  | 76.4 | 79.6 | 79.1 | 79.4 | 80.0 | 79.3 | 79.6 | 78.0 | 78.5 | 79.0 | 79.7 | 78.2 | 76.6 | 79.3 | 76.3 | 74.1 | 76.4 | 81.2 | -    | 75.6 | 78.8 | 81.3 | 76.4 | 77.0 |
| CC  | 75.6 | 75.4 | 77.0 | 76.6 | 76.9 | 77.8 | 76.9 | 75.1 | 75.1 | 75.6 | 76.9 | 77.6 | 77.3 | 77.7 | 75.6 | 75.3 | 75.3 | 75.6 | 78.5 | -    | 86.6 | 72.0 | 88.2 | 88.1 |
| EL  | 76.8 | 78.5 | 76.8 | 77.9 | 77.5 | 78.4 | 78.0 | 78.4 | 78.4 | 78.3 | 77.3 | 78.4 | 77.5 | 78.7 | 74.5 | 71.7 | 74.8 | 76.8 | 78.0 | 89.4 | -    | 73.6 | 87.7 | 90.1 |
| HF  | 79.8 | 79.5 | 79.4 | 81.3 | 80.6 | 79.0 | 78.5 | 80.3 | 80.2 | 79.7 | 79.4 | 80.0 | 78.7 | 80.7 | 77.5 | 77.5 | 77.3 | 88.4 | 82.5 | 76.0 | 76.7 | -    | 70.7 | 72.7 |
| SE  | 74.5 | 76.0 | 75.8 | 75.5 | 75.7 | 78.4 | 77.0 | 75.2 | 76.0 | 76.0 | 77.1 | 77.4 | 77.4 | 77.7 | 74.4 | 74.5 | 74.3 | 75.6 | 78.6 | 89.9 | 90.0 | 75.6 | -    | 92.5 |
| SH  | 76.2 | 76.5 | 76.9 | 76.3 | 75.8 | 77.6 | 77.8 | 75.9 | 75.7 | 76.1 | 76.9 | 77.8 | 77.8 | 77.9 | 74.6 | 74.2 | 74.2 | 76.5 | 78.4 | 90.4 | 91.2 | 76.2 | 94.9 | -    |

The percentage similarities between the full 16S rRNA gene sequences of the species are indicated in the lower left triangle, the percentage differences between the 5' end 527-bp 16S rRNA gene sequences of the species are indicated in the upper right triangle. Percentage similarities of >97% were highlighted in gray.

Abbreviations: EB, *Eubacterium brachy*; EBu, *Eubacterium budayi*; ES, *Eubacterium saburreum*; EC, *Eubacterium combesii*; ECt, *Eubacterium contortum*; EI, *Eubacterium infirmum*; EM, *Eubacterium minutum*; EMo, *Eubacterium moniliforme*; EMu, *Eubacterium multiforme*; EN, *Eubacterium nitritogenes*; ENo, *Eubacterium nodatum*; ESa, *Eubacterium saphenum*; ESu, *Eubacterium sulci*; ET, *Eubacterium tenue*; EYM, *Eubacterium yurii* subsp. *margaretiae*; EYS, *Eubacterium yurii* subsp. *schiitka*; EYY, *Eubacterium yurii* subsp. *yurii*; BE, *Bulleidia extracta*; CM, *Catenibacterium mitsuokai*; CC, *Cryptobacterium curtum*; EL, *Eggerthella lenta*; HF, *Holdemania filiformis*; SE, *Slackia exigua*; SH, *Slackia heliotrinireducens*.

**Supplementary Table 1d** Comparison of 16S rRNA gene sequences of medically important *Actinomyces*, *Actinobaculum* and *Arcanobacterium* species

|     | AB   | AH   | AP   | APi  | APy  | AS   | ASu  | ABv  | ABw  | AC   | ACt  | AD   | AE   | AF   | AG   | AGe  | AGr  | AHo  | AHw  | AHy  | AI   | AM   | AN   | ANe  | AO   | AR   | ARg  | ASl  | AT   | AU   | AV   |      |
|-----|------|------|------|------|------|------|------|------|------|------|------|------|------|------|------|------|------|------|------|------|------|------|------|------|------|------|------|------|------|------|------|------|
| AB  | -    | 93.0 | 93.6 | 94.1 | 96.6 | 89.5 | 88.7 | 87.1 | 86.4 | 85.7 | 85.3 | 85.6 | 83.9 | 84.7 | 85.3 | 79.9 | 86.9 | 86.6 | 84.2 | 84.0 | 80.7 | 86.9 | 84.7 | 86.3 | 87.6 | 86.8 | 84.6 | 84.2 | 86.6 | 86.8 | 85.3 |      |
| AH  | 94.6 | -    | 97.5 | 94.8 | 91.8 | 89.7 | 88.2 | 86.7 | 86.1 | 86.0 | 85.3 | 86.4 | 82.6 | 84.6 | 85.6 | 80.6 | 85.7 | 84.2 | 85.6 | 85.8 | 82.9 | 87.6 | 86.1 | 85.0 | 87.8 | 88.2 | 83.1 | 85.9 | 87.0 | 86.9 | 86.6 |      |
| AP  | 95.3 | 97.9 | -    | 95.3 | 92.7 | 91.3 | 89.4 | 88.0 | 88.1 | 87.8 | 85.7 | 88.0 | 84.6 | 86.7 | 87.5 | 82.8 | 87.0 | 86.4 | 86.2 | 87.3 | 83.7 | 89.5 | 87.0 | 85.8 | 89.5 | 89.6 | 83.4 | 86.9 | 87.9 | 88.4 | 88.0 |      |
| APi | 95.2 | 95.6 | 96.7 | -    | 93.1 | 90.2 | 89.6 | 88.1 | 86.4 | 85.9 | 86.4 | 86.0 | 82.3 | 85.7 | 86.5 | 81.1 | 87.0 | 84.4 | 83.7 | 85.1 | 83.0 | 88.3 | 84.9 | 86.7 | 87.8 | 86.9 | 83.6 | 84.6 | 87.4 | 87.6 | 85.7 |      |
| APy | 97.9 | 94.2 | 95.1 | 95.1 | -    | 89.2 | 88.4 | 86.6 | 87.4 | 85.3 | 87.1 | 86.6 | 83.9 | 84.4 | 86.5 | 80.3 | 85.8 | 86.3 | 84.3 | 85.1 | 83.0 | 86.4 | 86.7 | 87.3 | 86.2 | 86.9 | 83.2 | 86.3 | 85.8 | 85.7 | 85.9 |      |
| AS  | 91.4 | 91.5 | 91.9 | 92.0 | 91.6 | -    | 89.3 | 87.3 | 87.7 | 85.2 | 85.5 | 87.1 | 83.4 | 85.4 | 87.2 | 80.5 | 86.1 | 85.0 | 86.2 | 84.8 | 83.4 | 87.8 | 86.2 | 84.7 | 87.5 | 87.2 | 83.3 | 85.8 | 86.6 | 88.2 | 86.6 |      |
| ASu | 91.4 | 90.1 | 91.0 | 91.3 | 91.3 | 93.7 | -    | 83.8 | 85.9 | 83.9 | 83.7 | 83.6 | 82.9 | 83.8 | 84.1 | 84.2 | 84.3 | 83.4 | 82.3 | 82.8 | 83.0 | 84.6 | 82.7 | 84.8 | 84.2 | 83.4 | 81.8 | 83.6 | 85.6 | 84.0 | 83.5 |      |
| ABv | 89.6 | 90.2 | 90.1 | 90.4 | 89.6 | 89.0 | 87.4 | -    | 94.0 | 85.3 | 93.9 | 92.1 | 86.9 | 86.9 | 89.8 | 87.2 | 91.2 | 88.4 | 91.3 | 85.5 | 89.5 | 89.2 | 93.0 | 84.4 | 88.4 | 93.7 | 86.3 | 92.0 | 87.6 | 97.0 | 93.3 |      |
| ABw | 89.7 | 88.9 | 90.2 | 89.7 | 90.1 | 89.7 | 89.3 | 95.8 | -    | 85.9 | 93.1 | 95.0 | 87.9 | 86.1 | 89.3 | 86.6 | 88.9 | 87.0 | 91.1 | 87.2 | 88.0 | 90.7 | 95.3 | 84.3 | 88.6 | 92.6 | 86.2 | 92.9 | 90.2 | 95.0 | 97.2 |      |
| AC  | 89.9 | 90.5 | 91.2 | 90.6 | 89.8 | 89.6 | 88.7 | 90.5 | 90.9 | -    | 84.3 | 85.5 | 85.7 | 90.8 | 91.5 | 82.0 | 86.4 | 88.7 | 84.6 | 90.8 | 85.0 | 90.7 | 83.9 | 85.3 | 90.3 | 88.3 | 87.5 | 85.6 | 84.8 | 91.4 | 85.8 | 84.6 |
| ACt | 89.1 | 88.9 | 89.5 | 89.8 | 89.6 | 89.5 | 87.9 | 95.3 | 95.3 | 90.5 | -    | 91.8 | 87.2 | 84.9 | 87.4 | 87.1 | 90.6 | 87.4 | 92.1 | 84.3 | 89.5 | 86.5 | 91.2 | 83.0 | 86.4 | 91.8 | 83.8 | 90.2 | 85.4 | 93.3 | 92.3 |      |
| AD  | 88.6 | 88.6 | 89.4 | 88.6 | 89.0 | 89.2 | 87.9 | 94.3 | 95.9 | 90.6 | 94.0 | -    | 86.5 | 86.4 | 87.6 | 88.7 | 88.4 | 88.0 | 91.4 | 86.5 | 89.7 | 87.5 | 93.5 | 84.6 | 87.5 | 92.8 | 86.1 | 92.8 | 87.4 | 93.0 | 94.9 |      |
| AE  | 88.0 | 88.1 | 88.8 | 88.1 | 87.8 | 88.3 | 88.0 | 89.9 | 90.3 | 90.9 | 89.8 | 89.8 | -    | 85.6 | 84.4 | 83.5 | 86.2 | 86.6 | 86.4 | 85.9 | 83.9 | 85.3 | 88.7 | 86.4 | 85.8 | 87.5 | 85.4 | 87.1 | 86.3 | 89.2 | 88.4 |      |
| AF  | 88.6 | 88.9 | 90.1 | 89.7 | 88.9 | 88.8 | 88.1 | 90.6 | 91.0 | 94.6 | 89.8 | 90.5 | 90.1 | -    | 92.1 | 85.2 | 85.3 | 86.7 | 86.0 | 96.1 | 84.5 | 94.3 | 85.7 | 84.1 | 94.0 | 89.0 | 88.6 | 86.3 | 95.2 | 87.0 | 86.4 |      |
| AG  | 88.4 | 89.0 | 89.7 | 89.3 | 88.9 | 89.2 | 87.7 | 91.9 | 91.7 | 94.5 | 91.7 | 91.8 | 88.9 | 94.6 | -    | 85.0 | 87.6 | 87.1 | 88.9 | 91.8 | 85.6 | 96.9 | 88.0 | 84.7 | 95.9 | 88.5 | 90.0 | 88.3 | 96.2 | 88.4 | 89.0 |      |
| AGe | 86.5 | 86.9 | 87.5 | 86.9 | 86.5 | 86.8 | 87.5 | 92.7 | 92.5 | 89.0 | 92.8 | 93.2 | 88.4 | 90.1 | 90.8 | -    | 84.3 | 81.5 | 89.4 | 82.8 | 91.2 | 84.2 | 88.2 | 81.4 | 83.7 | 84.8 | 83.3 | 92.1 | 88.3 | 85.2 | 89.1 |      |
| AGr | 90.4 | 89.6 | 90.4 | 90.7 | 90.2 | 88.7 | 88.1 | 92.5 | 92.0 | 90.5 | 92.6 | 91.3 | 89.8 | 89.4 | 90.4 | 89.7 | -    | 87.3 | 89.4 | 85.1 | 88.2 | 86.4 | 87.6 | 85.2 | 88.0 | 91.4 | 85.7 | 87.8 | 88.2 | 92.4 | 89.1 |      |
| AHo | 90.2 | 90.3 | 91.0 | 90.2 | 89.9 | 89.9 | 87.9 | 90.8 | 89.8 | 92.6 | 90.7 | 89.9 | 90.7 | 91.1 | 91.1 | 87.9 | 90.1 | -    | 85.5 | 86.8 | 83.9 | 88.8 | 86.3 | 84.6 | 88.4 | 88.8 | 88.5 | 86.9 | 89.7 | 88.5 | 87.5 |      |
| AHw | 88.4 | 89.6 | 89.4 | 88.4 | 88.3 | 89.3 | 87.3 | 95.1 | 94.6 | 90.1 | 95.3 | 94.4 | 89.8 | 90.7 | 92.1 | 94.1 | 92.1 | 90.0 | -    | 84.2 | 91.8 | 87.6 | 92.0 | 82.5 | 85.3 | 89.6 | 84.3 | 93.4 | 88.0 | 90.9 | 92.7 |      |
| AHy | 88.4 | 89.3 | 89.9 | 89.5 | 89.2 | 89.2 | 88.2 | 90.5 | 91.7 | 94.3 | 90.3 | 90.8 | 91.0 | 97.1 | 94.7 | 89.9 | 89.6 | 91.4 | 90.4 | -    | 85.7 | 93.1 | 84.8 | 85.1 | 92.7 | 87.7 | 89.2 | 85.7 | 94.3 | 86.0 | 85.8 |      |
| AI  | 85.8 | 86.7 | 87.4 | 86.7 | 87.0 | 87.5 | 87.7 | 92.4 | 92.2 | 89.4 | 92.7 | 93.5 | 88.2 | 89.2 | 90.8 | 95.2 | 90.1 | 87.3 | 93.9 | 90.4 | -    | 84.3 | 90.1 | 83.2 | 84.2 | 87.5 | 85.6 | 89.3 | 85.0 | 87.6 | 89.5 |      |
| AM  | 89.1 | 89.9 | 90.6 | 90.3 | 89.1 | 89.6 | 87.8 | 92.0 | 91.8 | 94.1 | 90.9 | 90.8 | 90.2 | 96.0 | 97.5 | 90.5 | 90.2 | 92.4 | 91.9 | 95.5 | 88.8 | -    | 88.0 | 85.2 | 97.9 | 89.7 | 90.4 | 88.0 | 99.0 | 89.4 | 88.8 |      |
| AN  | 88.8 | 89.5 | 89.7 | 89.4 | 89.5 | 89.2 | 87.8 | 94.9 | 96.6 | 89.7 | 95.0 | 95.2 | 91.0 | 90.0 | 91.4 | 93.2 | 92.2 | 90.3 | 95.7 | 90.5 | 93.0 | 91.9 | -    | 82.8 | 86.8 | 91.7 | 84.2 | 92.2 | 87.1 | 92.7 | 97.1 |      |
| ANe | 88.7 | 89.1 | 89.5 | 89.9 | 89.0 | 88.8 | 87.9 | 88.5 | 88.5 | 90.0 | 88.1 | 88.1 | 89.9 | 88.2 | 88.5 | 86.8 | 88.4 | 89.2 | 87.8 | 89.7 | 86.8 | 88.9 | 88.1 | -    | 84.7 | 84.8 | 86.0 | 83.5 | 86.3 | 83.7 | 82.5 |      |
| AO  | 89.8 | 90.2 | 91.4 | 91.0 | 89.6 | 89.8 | 88.2 | 91.3 | 90.9 | 94.8 | 91.4 | 90.2 | 90.8 | 95.5 | 96.3 | 89.9 | 90.9 | 91.5 | 90.6 | 95.1 | 88.5 | 97.7 | 91.1 | 89.3 | -    | 90.3 | 89.4 | 85.1 | 98.8 | 89.3 | 88.4 |      |
| AR  | 89.2 | 89.7 | 90.3 | 89.5 | 89.1 | 89.4 | 87.5 | 95.4 | 94.9 | 91.2 | 95.5 | 94.0 | 90.2 | 91.4 | 91.2 | 91.4 | 93.3 | 91.3 | 94.4 | 91.1 | 91.7 | 92.2 | 95.0 | 88.3 | 92.6 | -    | 85.0 | 91.2 | 89.0 | 94.8 | 93.3 |      |
| ARg | 88.8 | 88.4 | 88.8 | 88.8 | 88.5 | 88.6 | 87.8 | 90.3 | 90.2 | 92.1 | 89.2 | 90.0 | 90.5 | 93.2 | 93.6 | 89.0 | 89.4 | 91.9 | 89.4 | 94.3 | 89.1 | 93.6 | 89.7 | 89.9 | 92.9 | 90.2 | -    | 85.2 | 90.7 | 85.5 | 84.5 |      |
| ASl | 89.1 | 89.0 | 89.9 | 89.1 | 89.8 | 89.2 | 87.9 | 94.6 | 95.8 | 90.8 | 95.4 | 94.6 | 90.0 | 90.2 | 91.4 | 94.2 | 91.6 | 90.2 | 95.5 | 90.7 | 92.2 | 90.9 | 95.4 | 88.2 | 90.6 | 95.0 | 89.9 | -    | 87.8 | 91.4 | 92.6 |      |
| AT  | 89.4 | 89.9 | 90.7 | 90.6 | 89.4 | 89.5 | 88.7 | 91.2 | 91.5 | 95.1 | 91.2 | 90.2 | 90.9 | 95.6 | 96.2 | 91.7 | 90.9 | 92.1 | 91.7 | 95.4 | 89.5 | 97.6 | 91.3 | 89.9 | 99.0 | 92.1 | 93.2 | 91.5 | -    | 87.8 | 88.0 |      |
| AU  | 89.7 | 89.8 | 90.4 | 90.2 | 89.4 | 90.0 | 88.1 | 97.2 | 96.5 | 90.8 | 96.0 | 95.0 | 90.8 | 91.2 | 91.3 | 92.0 | 93.5 | 91.1 | 95.3 | 91.0 | 92.2 | 91.9 | 95.7 | 88.7 | 91.8 | 96.9 | 90.2 | 95.6 | 91.4 | -    | 94.2 |      |
| AV  | 88.9 | 89.5 | 89.9 | 89.4 | 89.1 | 89.2 | 87.8 | 95.5 | 97.2 | 90.0 | 95.4 | 95.9 | 90.7 | 90.5 | 91.7 | 93.7 | 92.6 | 90.5 | 96.2 | 90.7 | 92.8 | 92.1 | 98.8 | 87.9 | 91.7 | 95.7 | 89.7 | 95.6 | 91.6 | 96.4 | -    |      |

The percentage similarities between the full 16S rRNA gene sequences of the species are indicated in the lower left triangle, the percentage differences between the 5' end 527-bp 16S rRNA gene sequences of the species are indicated in the upper right triangle. Percentage similarities of >97% were highlighted in gray.

Abbreviations: AB, *Arcanobacterium bernardiae*; AH, *Arcanobacterium haemolyticum*; AP, *Arcanobacterium phocae*; APi, *Arcanobacterium plurianimalium*; APy, *Arcanobacterium pyogenes*; AS, *Actinobaculum schaalii*; ASu, *Actinobaculum suis*; ABv, *Actinomyces bovis*; ABw, *Actinomyces bowdenii*; AC, *Actinomyces canis*; ACt, *Actinomyces catuli*; AD, *Actinomyces denticolens*; AE, *Actinomyces europaeus*; AF, *Actinomyces funkei*; AG, *Actinomyces georgiae*; AGe, *Actinomyces gerencseriae*; AGr, *Actinomyces graevenitzi*; AHo, *Actinomyces hordeovulneris*; AHw, *Actinomyces howellii*; AHy, *Actinomyces hyo vaginalis*; AI, *Actinomyces israelii*; AM, *Actinomyces meyeri*; AN, *Actinomyces naeslundii*; ANe, *Actinomyces neiui*; AO, *Actinomyces odontolyticus*; AR, *Actinomyces radidentis*; ARg, *Actinomyces radingae*; ASl, *Actinomyces slackii*; AT, *Actinomyces turicensis*; AU, *Actinomyces urogenitalis*; AV, *Actinomyces viscosus*.

**Supplementary Table 1e** Comparison of 16S rRNA gene sequences of medically important *Bacteroides* species

|     | BC   | BCa  | BD   | BE   | BF   | BM   | BO   | BP   | BS   | BSt  | BT   | BTh  | BU   | BUr  | BV   |
|-----|------|------|------|------|------|------|------|------|------|------|------|------|------|------|------|
| BC  | -    | 71.9 | 82.4 | 89.6 | 89.4 | 84.5 | 90.8 | 86.8 | 83.9 | 90.4 | 87.0 | 91.0 | 90.8 | 69.7 | 85.7 |
| BCa | 75.4 | -    | 75.5 | 73.1 | 71.1 | 74.7 | 72.0 | 73.4 | 75.1 | 73.5 | 73.0 | 71.2 | 72.3 | 74.3 | 69.3 |
| BD  | 83.6 | 73.6 | -    | 82.0 | 81.8 | 94.0 | 83.1 | 81.4 | 82.2 | 84.8 | 81.4 | 83.0 | 83.2 | 67.1 | 78.8 |
| BE  | 92.9 | 76.3 | 83.3 | -    | 90.2 | 84.1 | 89.9 | 86.9 | 81.1 | 92.8 | 87.5 | 90.9 | 92.5 | 69.6 | 88.2 |
| BF  | 94.1 | 74.5 | 83.0 | 93.2 | -    | 82.0 | 87.2 | 87.3 | 81.1 | 90.0 | 87.5 | 90.8 | 91.2 | 70.4 | 88.4 |
| BM  | 87.9 | 75.5 | 90.4 | 87.7 | 86.9 | -    | 84.0 | 82.9 | 83.8 | 86.4 | 82.5 | 84.8 | 85.3 | 67.4 | 78.9 |
| BO  | 95.1 | 75.1 | 83.5 | 93.3 | 93.1 | 88.0 | -    | 84.2 | 80.9 | 90.8 | 84.7 | 92.7 | 90.3 | 69.1 | 85.3 |
| BP  | 90.2 | 75.3 | 82.3 | 90.3 | 90.3 | 86.5 | 89.7 | -    | 82.5 | 88.4 | 99.2 | 86.6 | 91.6 | 68.6 | 85.6 |
| BS  | 84.9 | 74.3 | 81.1 | 83.6 | 82.8 | 85.0 | 83.7 | 83.3 | -    | 82.1 | 82.6 | 82.2 | 82.1 | 72.9 | 78.3 |
| BSt | 92.2 | 76.3 | 82.7 | 94.4 | 91.6 | 87.1 | 92.5 | 90.1 | 83.7 | -    | 88.2 | 92.2 | 94.2 | 70.1 | 87.7 |
| BT  | 90.2 | 75.0 | 81.4 | 90.4 | 90.1 | 86.1 | 89.8 | 98.8 | 82.9 | 90.2 | -    | 87.1 | 91.8 | 69.2 | 86.8 |
| BTh | 95.3 | 74.7 | 83.5 | 93.7 | 94.8 | 88.3 | 96.3 | 90.7 | 84.0 | 92.8 | 90.7 | -    | 92.2 | 70.9 | 86.6 |
| BU  | 93.4 | 76.4 | 84.0 | 94.5 | 93.4 | 87.9 | 93.0 | 91.4 | 83.7 | 94.6 | 91.6 | 93.9 | -    | 70.4 | 88.8 |
| BUr | 73.2 | 76.1 | 68.1 | 72.9 | 72.5 | 72.7 | 72.7 | 71.1 | 72.1 | 73.4 | 71.7 | 72.6 | 72.6 | -    | 69.0 |
| BV  | 90.8 | 74.0 | 81.7 | 90.7 | 91.0 | 85.1 | 89.7 | 88.1 | 81.9 | 89.4 | 88.2 | 90.7 | 91.7 | 72.3 | -    |

The percentage similarities between the full 16S rRNA gene sequences of the species are indicated in the lower left triangle, the percentage differences between the 5' end 527-bp 16S rRNA gene sequences of the species are indicated in the upper right triangle. Percentage similarities of >97% were highlighted in gray.

Abbreviations: BC, *Bacteroides caccae*; BCa, *Bacteroides capillosus*; BD, *Bacteroides distasonis*; BE, *Bacteroides eggerthii*; BF, *Bacteroides fragilis*; BM, *Bacteroides merdae*; BO, *Bacteroides ovatus*; BP, *Bacteroides pyogenes*; BS, *Bacteroides splanchnicus*; BSt, *Bacteroides stercoris*; BT, *Bacteroides tectus*; BTh, *Bacteroides thetaiotaomicron*; BU, *Bacteroides uniformis*; UBr, *Bacteroides ureolyticus*; BV, *Bacteroides vulgatus*.

**Supplementary Table 1f** Comparison of 16S rRNA gene sequences of medically important *Leptotrichia*, *Prevotella*, *Porphyromonas*, *Selenomonas* and *Sneathia* species

|     | LB   | PA   | PC   | PCo  | PCs  | PCt  | PCi  | PE   | PG   | PGu  | PL   | PM   | PB   | PBu  | PBl  | PCp  | PD   | PDe  | PDi  |
|-----|------|------|------|------|------|------|------|------|------|------|------|------|------|------|------|------|------|------|------|
| LB  | -    | 68.5 | 71.2 | 71.5 | 68.9 | 74.9 | 66.3 | 71.0 | 74.0 | 73.3 | 71.0 | 71.8 | 70.9 | 71.8 | 67.7 | 71.8 | 69.6 | 70.4 | 71.6 |
| PA  | 71.8 | -    | 82.1 | 82.2 | 83.5 | 81.2 | 84.6 | 83.9 | 82.7 | 83.2 | 82.8 | 82.2 | 81.4 | 79.5 | 78.0 | 81.1 | 77.7 | 77.6 | 79.9 |
| PC  | 73.2 | 86.0 | -    | 87.9 | 86.9 | 85.4 | 85.9 | 86.9 | 85.7 | 86.0 | 89.8 | 87.0 | 77.5 | 75.7 | 76.4 | 77.6 | 76.7 | 76.5 | 77.1 |
| PCo | 72.2 | 85.6 | 91.8 | -    | 85.5 | 85.5 | 84.5 | 83.7 | 85.9 | 86.2 | 84.6 | 86.6 | 78.0 | 76.0 | 76.5 | 76.0 | 77.6 | 77.4 | 75.8 |
| PCs | 73.1 | 85.5 | 89.5 | 89.5 | -    | 83.9 | 83.9 | 85.1 | 86.7 | 86.4 | 84.8 | 86.0 | 78.2 | 76.6 | 76.6 | 76.0 | 75.8 | 76.3 | 77.2 |
| PCt | 74.8 | 84.3 | 88.6 | 88.3 | 87.8 | -    | 85.0 | 86.2 | 89.0 | 90.4 | 84.1 | 86.3 | 77.8 | 77.1 | 77.1 | 77.5 | 79.1 | 76.4 | 77.8 |
| PCi | 72.8 | 87.7 | 87.3 | 86.0 | 86.1 | 86.0 | -    | 92.8 | 86.9 | 85.3 | 83.3 | 87.9 | 80.0 | 78.7 | 76.4 | 77.5 | 78.0 | 75.3 | 78.2 |
| PE  | 73.7 | 87.7 | 88.7 | 86.3 | 87.3 | 86.9 | 94.2 | -    | 86.5 | 87.4 | 84.1 | 87.7 | 79.3 | 78.7 | 77.8 | 80.0 | 78.5 | 77.4 | 79.1 |
| PG  | 74.0 | 85.6 | 89.3 | 88.3 | 89.4 | 89.3 | 87.3 | 87.8 | -    | 96.2 | 83.8 | 89.4 | 80.2 | 79.2 | 80.9 | 79.2 | 79.1 | 77.6 | 81.1 |
| PGu | 74.2 | 85.9 | 89.8 | 88.6 | 89.5 | 90.1 | 86.9 | 88.3 | 98.0 | -    | 84.2 | 88.8 | 79.6 | 78.2 | 79.3 | 79.1 | 79.6 | 77.0 | 80.5 |
| PL  | 73.2 | 85.1 | 91.3 | 89.2 | 87.3 | 87.0 | 86.2 | 86.6 | 87.0 | 87.0 | -    | 83.9 | 78.6 | 75.7 | 76.5 | 78.9 | 75.8 | 76.6 | 78.0 |
| PM  | 73.4 | 85.4 | 88.8 | 88.6 | 88.0 | 89.1 | 87.9 | 87.7 | 88.6 | 88.6 | 87.2 | -    | 80.5 | 80.8 | 79.0 | 79.9 | 79.4 | 77.9 | 79.0 |
| PB  | 72.2 | 80.6 | 80.5 | 79.4 | 79.6 | 80.5 | 80.2 | 80.0 | 81.0 | 80.9 | 79.8 | 79.5 | -    | 86.7 | 88.6 | 89.0 | 86.2 | 87.3 | 88.2 |
| PBu | 72.7 | 79.3 | 79.1 | 78.0 | 78.2 | 79.8 | 79.8 | 79.3 | 79.9 | 79.7 | 78.3 | 80.3 | 87.9 | -    | 87.5 | 88.7 | 88.4 | 89.6 | 83.1 |
| PBl | 71.8 | 78.3 | 79.2 | 78.3 | 78.2 | 80.1 | 78.4 | 78.2 | 80.4 | 79.9 | 79.1 | 79.3 | 90.1 | 88.7 | -    | 90.0 | 85.7 | 87.2 | 86.2 |
| PCp | 72.5 | 79.7 | 79.7 | 78.2 | 79.3 | 80.8 | 79.3 | 80.0 | 80.8 | 80.8 | 80.3 | 79.9 | 90.8 | 88.7 | 90.6 | -    | 86.2 | 89.7 | 89.7 |
| PD  | 70.7 | 78.9 | 79.8 | 79.2 | 78.2 | 81.2 | 78.6 | 78.5 | 79.2 | 79.9 | 78.7 | 79.0 | 89.5 | 89.5 | 88.2 | 89.3 | -    | 83.8 | 82.6 |
| PDe | 71.3 | 78.0 | 79.5 | 78.5 | 78.4 | 79.8 | 78.2 | 78.4 | 79.1 | 79.4 | 78.6 | 78.4 | 89.1 | 90.7 | 88.5 | 90.7 | 89.3 | -    | 86.2 |
| PDi | 72.7 | 79.5 | 79.5 | 77.7 | 79.4 | 80.0 | 79.9 | 80.1 | 81.0 | 80.9 | 80.2 | 79.6 | 91.8 | 86.7 | 89.4 | 92.1 | 87.1 | 89.1 | -    |
| PEn | 70.8 | 78.5 | 78.8 | 77.9 | 78.1 | 79.3 | 78.7 | 78.6 | 79.9 | 79.6 | 78.6 | 78.9 | 88.4 | 87.5 | 88.9 | 88.7 | 87.7 | 87.6 | 87.7 |
| PH  | 71.6 | 80.6 | 83.1 | 81.8 | 81.1 | 83.5 | 82.7 | 81.8 | 83.4 | 83.2 | 83.4 | 82.6 | 84.7 | 84.1 | 84.4 | 84.5 | 83.5 | 84.6 | 83.3 |
| PI  | 72.5 | 78.3 | 79.2 | 78.2 | 79.6 | 80.7 | 79.5 | 79.9 | 80.6 | 80.9 | 79.2 | 78.4 | 90.9 | 87.1 | 88.2 | 92.6 | 88.1 | 89.7 | 93.7 |
| PLo | 71.6 | 79.3 | 80.7 | 79.7 | 78.7 | 81.4 | 80.5 | 79.8 | 80.8 | 81.2 | 79.9 | 80.5 | 89.7 | 90.3 | 90.2 | 89.8 | 90.5 | 89.7 | 88.0 |
| PMe | 72.1 | 79.1 | 81.5 | 79.7 | 79.8 | 80.9 | 79.3 | 79.6 | 79.9 | 80.8 | 80.9 | 79.2 | 91.8 | 88.2 | 89.0 | 92.4 | 89.1 | 93.5 | 91.8 |
| PN  | 71.6 | 77.6 | 78.2 | 77.4 | 78.5 | 79.9 | 78.0 | 78.6 | 80.0 | 80.1 | 78.8 | 77.9 | 89.4 | 87.6 | 88.8 | 92.7 | 88.1 | 90.7 | 91.1 |
| PO  | 70.4 | 77.6 | 79.9 | 79.3 | 79.1 | 80.4 | 78.1 | 77.8 | 78.9 | 79.8 | 79.0 | 78.8 | 88.4 | 88.3 | 89.9 | 87.8 | 89.0 | 88.0 | 86.3 |
| POr | 72.3 | 79.0 | 79.7 | 78.1 | 78.8 | 81.0 | 78.8 | 78.7 | 80.1 | 79.8 | 80.0 | 79.1 | 91.1 | 89.6 | 91.3 | 90.7 | 89.6 | 91.0 | 89.1 |
| POu | 72.9 | 79.6 | 80.7 | 79.3 | 79.8 | 81.3 | 80.1 | 80.1 | 80.4 | 80.5 | 80.0 | 80.5 | 91.3 | 88.1 | 89.6 | 91.3 | 89.2 | 90.2 | 91.8 |
| PP  | 72.0 | 79.0 | 79.0 | 78.4 | 79.3 | 79.7 | 80.1 | 79.9 | 80.6 | 80.5 | 79.4 | 79.5 | 91.1 | 86.0 | 88.2 | 93.0 | 87.4 | 89.1 | 93.7 |
| PT  | 70.5 | 76.9 | 79.1 | 77.9 | 79.0 | 79.9 | 77.1 | 77.7 | 79.6 | 79.7 | 78.7 | 78.5 | 83.6 | 84.1 | 83.1 | 83.1 | 83.1 | 84.2 | 82.1 |
| PV  | 71.8 | 79.6 | 80.7 | 78.8 | 79.3 | 80.3 | 79.5 | 79.9 | 79.7 | 80.2 | 79.5 | 79.2 | 91.8 | 88.7 | 89.4 | 92.3 | 89.3 | 92.3 | 91.6 |
| PZ  | 71.7 | 81.0 | 82.6 | 81.4 | 80.8 | 82.6 | 82.8 | 81.3 | 83.0 | 83.1 | 82.2 | 82.5 | 84.7 | 83.9 | 83.6 | 83.9 | 83.9 | 84.6 | 82.4 |
| SD  | 79.3 | 70.7 | 72.5 | 70.9 | 72.9 | 72.8 | 70.8 | 72.5 | 73.0 | 73.4 | 71.7 | 72.4 | 71.7 | 71.3 | 72.1 | 71.8 | 71.2 | 72.1 | 71.7 |
| SF  | 77.9 | 71.1 | 72.0 | 70.7 | 72.0 | 72.1 | 69.7 | 72.1 | 72.6 | 73.3 | 71.4 | 71.4 | 72.2 | 72.0 | 71.8 | 71.2 | 71.0 | 72.0 | 72.0 |
| SI  | 78.6 | 70.4 | 72.2 | 71.1 | 72.8 | 72.5 | 70.2 | 71.7 | 72.1 | 73.0 | 71.3 | 71.9 | 72.2 | 71.4 | 71.2 | 70.9 | 71.4 | 71.8 | 71.6 |
| SN  | 77.0 | 71.2 | 72.0 | 71.3 | 72.4 | 72.6 | 70.5 | 72.3 | 72.7 | 72.8 | 71.3 | 71.8 | 72.1 | 70.8 | 71.1 | 71.2 | 71.0 | 71.0 | 71.5 |
| SS  | 76.4 | 71.0 | 71.7 | 70.4 | 71.6 | 72.4 | 70.9 | 72.6 | 72.9 | 72.3 | 71.3 | 72.6 | 71.9 | 72.3 | 72.3 | 72.4 | 72.2 | 72.2 | 71.4 |
| SSa | 85.9 | 70.0 | 71.8 | 71.1 | 71.5 | 71.0 | 70.1 | 70.2 | 70.4 | 71.4 | 74.2 | 72.4 | 71.0 | 67.6 | 69.1 | 69.3 | 67.7 | 68.5 | 70.3 |

|     | PEn  | PH   | PI   | PLo  | PMe  | PN   | PO   | POr  | POu  | PP   | PT   | PV   | PZ   | SD   | SF   | SI   | SN   | SS   | SSa  |
|-----|------|------|------|------|------|------|------|------|------|------|------|------|------|------|------|------|------|------|------|
| LB  | 70.0 | 67.6 | 71.8 | 66.7 | 69.8 | 71.5 | 68.3 | 67.3 | 70.8 | 71.9 | 70.8 | 70.6 | 67.4 | 77.9 | 75.7 | 75.9 | 73.5 | 73.6 | 85.2 |
| PA  | 79.0 | 77.1 | 77.8 | 79.5 | 79.6 | 77.4 | 75.9 | 79.1 | 80.2 | 79.4 | 74.2 | 81.3 | 78.8 | 69.4 | 69.8 | 68.9 | 70.0 | 70.5 | 65.3 |
| PC  | 76.8 | 80.0 | 76.8 | 78.6 | 79.1 | 74.5 | 76.6 | 76.4 | 77.4 | 77.9 | 75.1 | 78.1 | 79.6 | 69.7 | 69.1 | 68.4 | 68.8 | 68.3 | 68.3 |
| PCo | 76.5 | 79.1 | 76.3 | 78.5 | 78.2 | 75.0 | 75.9 | 75.6 | 76.3 | 76.6 | 73.8 | 77.2 | 80.1 | 70.0 | 69.6 | 68.9 | 70.1 | 67.5 | 67.5 |
| PCs | 76.2 | 77.5 | 77.0 | 77.3 | 77.7 | 75.0 | 77.1 | 77.0 | 77.6 | 77.7 | 76.8 | 78.1 | 78.5 | 72.3 | 70.6 | 71.3 | 71.3 | 69.6 | 69.0 |
| PCt | 78.9 | 79.9 | 78.7 | 80.3 | 77.4 | 77.5 | 78.3 | 79.3 | 78.1 | 78.3 | 75.5 | 76.6 | 79.9 | 73.4 | 70.6 | 71.7 | 72.3 | 72.5 | 68.7 |
| PCi | 78.5 | 81.3 | 78.8 | 80.0 | 77.5 | 76.8 | 76.7 | 76.9 | 78.9 | 79.5 | 73.7 | 78.1 | 81.3 | 71.1 | 68.6 | 69.2 | 69.8 | 68.8 | 65.6 |
| PE  | 79.6 | 79.6 | 80.0 | 79.6 | 79.2 | 77.6 | 77.0 | 77.4 | 80.4 | 80.3 | 74.1 | 80.0 | 79.3 | 71.0 | 70.9 | 70.0 | 71.1 | 70.6 | 67.5 |
| PG  | 80.0 | 80.1 | 79.4 | 80.7 | 78.4 | 78.1 | 77.2 | 80.0 | 80.1 | 81.1 | 76.6 | 78.2 | 80.5 | 75.0 | 73.5 | 72.3 | 72.8 | 73.8 | 68.4 |
| PGu | 78.8 | 79.0 | 78.4 | 81.2 | 79.0 | 76.4 | 78.6 | 78.5 | 78.6 | 80.1 | 76.4 | 78.6 | 79.9 | 74.5 | 73.8 | 72.2 | 72.2 | 72.1 | 69.4 |
| PL  | 77.1 | 80.4 | 77.0 | 78.1 | 80.4 | 77.4 | 77.8 | 78.4 | 77.9 | 77.8 | 73.9 | 76.0 | 80.6 | 70.7 | 69.8 | 69.9 | 69.4 | 68.6 | 73.9 |
| PM  | 79.8 | 80.9 | 78.0 | 81.4 | 79.1 | 77.2 | 78.1 | 79.1 | 80.8 | 79.9 | 77.9 | 79.3 | 81.9 | 73.3 | 71.0 | 72.4 | 71.6 | 72.4 | 70.9 |
| PB  | 88.7 | 83.4 | 88.0 | 88.3 | 90.3 | 88.2 | 86.1 | 89.0 | 88.3 | 87.6 | 82.5 | 89.9 | 84.0 | 72.5 | 72.7 | 73.7 | 73.3 | 71.9 | 69.2 |
| PBu | 87.3 | 81.6 | 85.1 | 91.5 | 86.8 | 86.0 | 88.0 | 88.1 | 85.9 | 83.9 | 82.1 | 87.8 | 82.2 | 72.3 | 71.1 | 71.1 | 70.7 | 72.9 | 64.9 |
| PBl | 88.6 | 82.5 | 85.6 | 89.9 | 87.6 | 87.5 | 87.6 | 92.5 | 88.9 | 86.3 | 81.6 | 88.8 | 82.3 | 73.1 | 71.8 | 70.9 | 70.1 | 72.4 | 67.6 |
| PCp | 87.6 | 80.4 | 89.1 | 90.0 | 90.5 | 91.0 | 87.1 | 90.1 | 89.5 | 90.8 | 80.3 | 90.3 | 82.4 | 72.5 | 70.3 | 70.3 | 70.2 | 71.7 | 65.6 |
| PD  | 85.5 | 79.8 | 83.9 | 90.0 | 84.6 | 85.3 | 87.1 | 84.8 | 84.2 | 84.3 | 78.1 | 85.2 | 80.8 | 71.5 | 71.2 | 71.2 | 70.4 | 71.1 | 64.2 |
| PDe | 87.3 | 81.3 | 86.8 | 87.9 | 93.9 | 89.1 | 86.5 | 89.0 | 87.1 | 88.6 | 80.4 | 90.7 | 82.5 | 72.3 | 71.5 | 70.9 | 69.1 | 71.5 | 65.1 |
| PDi | 86.7 | 79.2 | 91.0 | 85.3 | 90.6 | 89.7 | 82.7 | 85.6 | 88.4 | 91.7 | 78.5 | 90.0 | 80.0 | 72.2 | 72.1 | 72.7 | 72.2 | 71.4 | 68.5 |
| PEn | -    | 79.8 | 87.5 | 89.5 | 88.9 | 87.1 | 90.3 | 89.0 | 87.5 | 88.2 | 80.4 | 87.7 | 80.6 | 71.2 | 70.9 | 69.1 | 68.6 | 69.1 | 67.2 |
| PH  | 82.8 | -    | 80.9 | 83.4 | 83.1 | 81.9 | 82.0 | 82.1 | 82.4 | 80.9 | 81.8 | 81.5 | 97.4 | 71.9 | 69.7 | 70.5 | 69.5 | 71.3 | 66.7 |
| PI  | 87.8 | 84.1 | -    | 86.6 | 89.3 | 91.5 | 84.8 | 86.6 | 86.5 | 90.6 | 78.8 | 87.5 | 80.9 | 73.3 | 70.4 | 71.5 | 70.8 | 70.9 | 68.2 |
| PLo | 89.1 | 84.9 | 89.2 | -    | 87.4 | 88.7 | 91.3 | 88.6 | 86.5 | 87.3 | 81.3 | 87.2 | 84.2 | 71.0 | 69.9 | 69.9 | 69.3 | 71.2 | 68.9 |
| PMe | 89.0 | 84.8 | 91.6 | 89.5 | -    | 89.3 | 86.9 | 88.8 | 89.3 | 89.4 | 80.8 | 92.7 | 84.2 | 72.1 | 70.2 | 70.9 | 70.9 | 71.8 | 67.2 |
| PN  | 87.2 | 84.1 | 93.7 | 89.2 | 90.3 | -    | 85.0 | 88.5 | 86.3 | 92.6 | 80.8 | 87.7 | 83.3 | 71.7 | 71.1 | 70.1 | 70.0 | 70.3 | 66.4 |
| PO  | 89.7 | 83.9 | 86.7 | 90.3 | 88.5 | 87.0 | -    | 85.7 | 84.6 | 84.5 | 78.5 | 84.5 | 82.8 | 69.2 | 67.7 | 69.1 | 68.5 | 70.0 | 66.5 |
| POr | 89.1 | 84.3 | 89.8 | 90.5 | 91.3 | 89.7 | 88.1 | -    | 90.6 | 87.1 | 81.1 | 89.0 | 82.9 | 73.5 | 70.3 | 72.1 | 69.9 | 72.1 | 67.1 |
| POu | 88.2 | 84.4 | 90.5 | 89.1 | 92.5 | 88.8 | 87.9 | 92.4 | -    | 88.2 | 82.6 | 89.9 | 84.2 | 74.3 | 71.4 | 72.7 | 72.8 | 73.4 | 68.6 |
| PP  | 87.9 | 84.0 | 94.1 | 88.4 | 91.8 | 93.2 | 87.2 | 89.4 | 91.3 | -    | 79.9 | 89.4 | 82.4 | 72.0 | 68.4 | 69.4 | 69.4 | 70.1 | 68.7 |
| PT  | 82.4 | 84.2 | 81.8 | 82.7 | 83.0 | 83.2 | 83.1 | 83.2 | 83.5 | 81.9 | -    | 81.9 | 83.0 | 68.7 | 69.3 | 68.8 | 68.2 | 69.0 | 68.3 |
| PV  | 88.3 | 84.0 | 90.9 | 89.3 | 96.8 | 89.8 | 87.2 | 91.3 | 92.6 | 91.8 | 83.5 | -    | 81.5 | 73.2 | 71.7 | 72.7 | 71.9 | 73.3 | 68.8 |
| PZ  | 83.2 | 96.7 | 83.2 | 85.0 | 84.4 | 84.6 | 84.3 | 84.1 | 84.2 | 83.0 | 84.3 | 83.4 | -    | 72.7 | 69.9 | 71.7 | 69.8 | 71.8 | 67.7 |
| SD  | 71.9 | 73.2 | 72.4 | 71.8 | 72.0 | 71.5 | 70.9 | 71.9 | 72.5 | 72.2 | 72.3 | 72.2 | 72.7 | -    | 95.0 | 97.0 | 94.5 | 88.6 | 76.1 |
| SF  | 72.4 | 72.9 | 71.5 | 71.9 | 71.7 | 71.2 | 70.6 | 71.5 | 71.4 | 71.0 | 72.1 | 72.0 | 72.4 | 97.0 | -    | 95.4 | 95.7 | 86.3 | 72.7 |
| SI  | 71.0 | 72.6 | 71.8 | 71.2 | 72.0 | 71.0 | 71.6 | 71.3 | 72.0 | 70.2 | 71.3 | 71.9 | 72.7 | 98.4 | 97.3 | -    | 96.1 | 87.3 | 73.8 |
| SN  | 71.0 | 72.5 | 71.6 | 71.0 | 71.7 | 70.7 | 70.9 | 70.5 | 71.5 | 71.4 | 71.5 | 71.8 | 71.8 | 96.1 | 96.7 | 96.8 | -    | 87.0 | 72.7 |
| SS  | 72.4 | 73.1 | 71.9 | 71.8 | 71.9 | 71.5 | 71.2 | 72.2 | 71.9 | 71.0 | 72.2 | 72.5 | 73.1 | 91.8 | 90.3 | 89.8 | 90.7 | -    | 71.0 |
| SSa | 69.4 | 70.1 | 69.8 | 70.4 | 70.4 | 68.9 | 69.2 | 69.1 | 69.9 | 70.6 | 69.6 | 70.7 | 70.9 | 77.0 | 75.5 | 75.7 | 75.3 | 74.4 | -    |

The percentage similarities between the full 16S rRNA gene sequences of the species are indicated in the lower left triangle, the percentage differences between the 5' end 527-bp 16S rRNA gene sequences of the species are indicated in the upper right triangle. Percentage similarities of >97% were highlighted in gray.

Abbreviations: LB, *Leptotrichia buccalis*; PA, *Porphyromonas asaccharolytica*; PC, *Porphyromonas cangingivalis*; PCo, *Porphyromonas canoris*; PCs, *Porphyromonas cansulci*; PCt, *Porphyromonas catoniae*; PCi, *Porphyromonas circumdentaria*; PE, *Porphyromonas endodontalis*; PG, *Porphyromonas gingivalis*; PGu, *Porphyromonas gulae*; PL, *Porphyromonas levii*; PM, *Porphyromonas macacae*; PB, *Prevotella bivia*; PBU, *Prevotella buccae*; PBl, *Prevotella buccalis*; PCp, *Prevotella corporis*; PD, *Prevotella dentalis*; PDe, *Prevotella denticola*; PDi, *Prevotella disiens*; PEn, *Prevotella enoeca*; PH, *Prevotella heparinolytica*; PI, *Prevotella intermedia*; PLo, *Prevotella loescheii*; PMe, *Prevotella melaninogenica*; PN, *Prevotella nigrescens*; PO, *Prevotella oralis*; POr, *Prevotella oris*; POu, *Prevotella oulorum*; PP, *Prevotella pallens*; PT, *Prevotella tanneriae*; PV, *Prevotella veroralis*; PZ, *Prevotella zoogloformans*; SD, *Selenomonas diana*; SF, *Selenomonas flueggei*; SI, *Selenomonas infelix*; SN, *Selenomonas noxia*; SS, *Selenomonas sputigena*; SSa, *Sneathia sanguinegens*.

**Supplementary Table 1g** Comparison of 16S rRNA gene sequences of medically important *Alistipes*, *Anaerobiospirillum*, *Bilophila*, *Butyrivibrio*, *Desulfovibrio*, *Dialister*, *Faecalibacterium*, *Filifactor*, *Fusobacterium*, *Johnsonella*, *Megamonas*, *Succinivibrio*, *Sutterella*, *Tannerella* and *Tissierella* species

|      | AP   | AS   | AT   | BW   | BF   | DP   | DPn  | FP   | FA   | FG   | FM   | FN   | FNe  | FNuA | FNuN | FNuP | FPe  | FR   | FU   | FV    | JI   | MH   | SD   | SW   | TF   | TP   |      |      |
|------|------|------|------|------|------|------|------|------|------|------|------|------|------|------|------|------|------|------|------|-------|------|------|------|------|------|------|------|------|
| AP   | -    | 72.8 | 72.2 | 71.1 | 71.8 | 71.5 | 68.6 | 74.9 | 69.8 | 70.8 | 69.8 | 70.5 | 73.5 | 70.5 | 70.8 | 71.8 | 70.4 | 68.6 | 69.8 | 70.1  | 68.1 | 74.1 | 72.6 | 72.9 | 82.0 | 74.0 |      |      |
| AS   | 73.8 | -    | 92.2 | 79.1 | 80.8 | 80.5 | 78.4 | 81.6 | 75.8 | 77.1 | 75.4 | 73.2 | 71.7 | 72.1 | 72.3 | 72.5 | 76.0 | 73.4 | 75.8 | 75.9  | 73.9 | 69.5 | 92.5 | 82.6 | 70.6 | 74.2 |      |      |
| AT   | 73.4 | 93.4 | -    | 77.3 | 79.2 | 78.1 | 74.4 | 82.0 | 74.9 | 75.8 | 75.0 | 73.7 | 74.7 | 72.8 | 72.2 | 74.0 | 74.1 | 74.9 | 74.4 | 75.6  | 73.9 | 75.3 | 92.5 | 79.4 | 70.7 | 74.2 |      |      |
| BW   | 74.5 | 79.6 | 78.9 | -    | 79.1 | 88.1 | 77.6 | 78.5 | 76.7 | 76.0 | 75.8 | 73.2 | 74.3 | 72.5 | 73.8 | 74.2 | 74.1 | 72.1 | 76.7 | 76.4  | 75.6 | 75.8 | 77.0 | 71.9 | 70.8 | 78.2 |      |      |
| BF   | 76.2 | 78.8 | 78.3 | 78.9 | -    | 75.2 | 77.0 | 77.4 | 79.2 | 79.7 | 78.5 | 73.9 | 73.0 | 72.5 | 72.3 | 72.8 | 77.9 | 73.7 | 78.4 | 79.0  | 80.8 | 75.1 | 79.9 | 76.1 | 68.5 | 77.4 |      |      |
| DP   | 73.3 | 79.9 | 79.5 | 90.8 | 78.0 | -    | 80.1 | 79.8 | 78.6 | 75.7 | 75.7 | 74.1 | 77.3 | 73.7 | 74.4 | 76.2 | 75.1 | 77.1 | 76.7 | 76.3  | 77.6 | 77.0 | 78.6 | 75.8 | 70.5 | 78.0 |      |      |
| DPn  | 72.8 | 77.4 | 76.6 | 79.1 | 78.9 | 79.0 | -    | 82.0 | 75.2 | 78.7 | 77.9 | 76.3 | 76.7 | 75.8 | 76.2 | 72.1 | 71.0 | 73.4 | 78.4 | 78.5  | 73.5 | 81.1 | 78.2 | 75.8 | 67.8 | 76.7 |      |      |
| FP   | 75.7 | 80.2 | 79.4 | 79.2 | 79.6 | 78.9 | 82.1 | -    | 76.9 | 78.0 | 78.0 | 76.6 | 76.7 | 75.1 | 75.7 | 77.4 | 78.7 | 77.8 | 78.2 | 78.6  | 77.2 | 82.8 | 82.0 | 78.6 | 70.1 | 78.0 |      |      |
| FA   | 75.0 | 76.6 | 77.1 | 76.9 | 82.3 | 77.8 | 78.6 | 79.7 | -    | 70.5 | 69.8 | 71.8 | 66.5 | 71.5 | 72.2 | 67.7 | 72.8 | 67.0 | 70.2 | 70.3  | 78.3 | 78.6 | 76.7 | 72.7 | 69.9 | 78.5 |      |      |
| FG   | 74.0 | 79.2 | 78.2 | 77.6 | 81.5 | 76.8 | 78.8 | 79.5 | 75.8 | -    | 93.9 | 91.4 | 97.7 | 91.9 | 92.8 | 92.6 | 93.4 | 93.9 | 94.2 | 93.9  | 94.2 | 93.9 | 74.7 | 77.0 | 75.7 | 74.3 | 70.3 | 74.6 |
| FM   | 74.2 | 77.9 | 77.2 | 76.9 | 81.5 | 77.1 | 78.8 | 78.7 | 75.9 | 95.3 | -    | 92.8 | 92.8 | 92.6 | 93.3 | 94.0 | 94.1 | 95.1 | 99.3 | 100.0 | 74.7 | 75.7 | 76.0 | 73.0 | 69.5 | 75.3 |      |      |
| FN   | 74.0 | 77.4 | 77.0 | 75.9 | 78.6 | 76.2 | 77.2 | 78.2 | 76.3 | 93.1 | 94.2 | -    | 89.6 | 97.2 | 98.0 | 97.5 | 97.7 | 94.2 | 93.3 | 93.1  | 73.6 | 74.1 | 74.2 | 71.4 | 68.8 | 74.6 |      |      |
| FNe  | 74.1 | 76.6 | 76.9 | 76.6 | 78.3 | 76.7 | 77.0 | 78.3 | 73.0 | 98.0 | 94.5 | 92.5 | -    | 89.9 | 90.9 | 91.8 | 92.2 | 92.8 | 93.0 | 92.8  | 75.3 | 75.8 | 75.3 | 74.7 | 71.7 | 76.2 |      |      |
| FNuA | 73.5 | 74.2 | 73.8 | 75.0 | 77.9 | 75.0 | 77.4 | 77.0 | 75.4 | 94.3 | 94.6 | 98.1 | 92.5 | -    | 97.3 | 96.3 | 96.9 | 93.7 | 93.0 | 92.8  | 74.0 | 73.6 | 72.9 | 71.0 | 69.0 | 75.8 |      |      |
| FNuN | 74.0 | 77.3 | 76.7 | 76.2 | 78.0 | 76.2 | 77.3 | 77.9 | 76.4 | 93.7 | 94.4 | 99.0 | 93.0 | 98.1 | -    | 97.8 | 98.8 | 94.2 | 93.7 | 93.5  | 74.8 | 73.5 | 73.9 | 71.5 | 69.5 | 76.2 |      |      |
| FNuP | 74.2 | 77.1 | 77.2 | 76.0 | 78.3 | 76.7 | 75.7 | 78.2 | 74.0 | 93.8 | 94.7 | 98.6 | 93.5 | 97.5 | 98.8 | -    | 99.1 | 95.3 | 94.2 | 94.2  | 69.4 | 75.3 | 76.1 | 69.2 | 70.8 | 77.0 |      |      |
| FPe  | 74.0 | 79.0 | 77.9 | 76.7 | 80.6 | 77.1 | 78.0 | 79.0 | 76.9 | 94.7 | 95.3 | 98.6 | 94.4 | 98.0 | 98.9 | 99.3 | -    | 94.6 | 94.4 | 94.1  | 75.6 | 67.5 | 76.5 | 73.6 | 70.1 | 76.3 |      |      |
| FR   | 74.3 | 77.2 | 75.8 | 75.1 | 79.0 | 76.4 | 76.1 | 78.2 | 73.9 | 95.6 | 94.9 | 95.4 | 94.2 | 95.4 | 95.3 | 95.6 | 95.3 | -    | 95.1 | 95.1  | 69.9 | 76.0 | 76.4 | 69.3 | 70.5 | 75.7 |      |      |
| FU   | 74.2 | 78.0 | 77.1 | 77.3 | 81.5 | 77.4 | 78.8 | 78.8 | 76.0 | 95.4 | 99.7 | 94.2 | 94.7 | 94.7 | 94.5 | 94.7 | 95.3 | 95.0 | -    | 99.3  | 74.6 | 76.2 | 75.9 | 73.7 | 70.2 | 75.7 |      |      |
| FV   | 74.1 | 78.2 | 77.5 | 77.2 | 81.9 | 77.4 | 79.1 | 78.9 | 76.2 | 95.4 | 99.9 | 94.3 | 94.7 | 94.7 | 94.5 | 94.9 | 95.3 | 95.1 | 99.6 | -     | 75.3 | 76.3 | 76.8 | 73.6 | 70.1 | 75.9 |      |      |
| JI   | 73.9 | 76.0 | 76.7 | 79.0 | 84.7 | 78.9 | 78.4 | 81.0 | 80.6 | 78.4 | 78.4 | 77.2 | 78.0 | 77.2 | 77.8 | 75.7 | 77.9 | 76.4 | 78.5 | 78.7  | -    | 76.2 | 74.2 | 72.9 | 70.5 | 76.9 |      |      |
| MH   | 74.3 | 78.3 | 77.6 | 78.1 | 77.7 | 78.6 | 84.8 | 82.3 | 78.8 | 78.3 | 77.5 | 77.0 | 77.3 | 75.6 | 76.8 | 76.7 | 76.9 | 77.7 | 77.6 | 77.8  | 79.8 | -    | 71.1 | 76.2 | 71.5 | 80.7 |      |      |
| SD   | 73.9 | 92.7 | 92.6 | 78.3 | 78.4 | 78.9 | 77.0 | 79.7 | 77.3 | 78.1 | 77.9 | 77.0 | 77.0 | 74.9 | 77.0 | 77.7 | 77.9 | 77.9 | 77.8 | 78.2  | 75.9 | 77.5 | -    | 81.2 | 71.9 | 76.3 |      |      |
| SW   | 74.2 | 81.8 | 80.9 | 76.6 | 77.9 | 77.8 | 76.3 | 78.0 | 76.4 | 76.1 | 76.0 | 74.9 | 76.1 | 72.6 | 75.0 | 74.2 | 76.4 | 74.5 | 76.2 | 76.3  | 76.6 | 75.9 | 81.1 | -    | 73.5 | 73.4 |      |      |
| TF   | 84.4 | 72.7 | 72.5 | 73.8 | 73.0 | 72.1 | 71.4 | 73.9 | 73.2 | 72.2 | 72.5 | 72.7 | 73.0 | 71.7 | 72.9 | 72.3 | 72.1 | 72.1 | 72.8 | 72.8  | 73.4 | 72.1 | 73.1 | 72.5 | -    | 74.9 |      |      |
| TP   | 76.7 | 76.7 | 76.1 | 78.4 | 81.4 | 78.4 | 79.7 | 79.2 | 82.8 | 77.8 | 78.1 | 77.9 | 77.6 | 78.7 | 78.4 | 78.4 | 78.5 | 78.0 | 78.3 | 78.4  | 80.8 | 80.5 | 75.6 | 77.4 | 75.8 | -    |      |      |

The percentage similarities between the full 16S rRNA gene sequences of the species are indicated in the lower left triangle, the percentage differences between the 5' end 527-bp 16S rRNA gene sequences of the species are indicated in the upper right triangle. Percentage similarities of >97% were highlighted in gray.

Abbreviations: AP, *Alistipes putredinis*; AS, *Anaerobiospirillum succiniciproducens*; AT, *Anaerobiospirillum thomasi*; BW, *Bilophila wadsworthia*; BF, *Butyrivibrio fibrisolvens*; DP, *Desulfovibrio piger*; DPn, *Dialister pneumosintes*; FP, *Faecalibacterium prausnitzii*; FA, *Filifactor alocis*; FG, *Fusobacterium gonidiaformans*; FM, *Fusobacterium mortiferum*; FN, *Fusobacterium naviforme*; FNe, *Fusobacterium necrophorum*; FNuA, *Fusobacterium nucleatum* subsp. *animalis*; FNuN, *Fusobacterium nucleatum* subsp. *nucleatum*; FNuP, *Fusobacterium nucleatum* subsp. *polymorphum*; FPe, *Fusobacterium periodonticum*; FR, *Fusobacterium russii*; FU, *Fusobacterium ulcerans*; FV, *Fusobacterium varium*; JI, *Johnsonella ignava*; MH, *Megamonas hypermegale*; SD, *Succinivibrio dextrinosolvens*; SW, *Sutterella wadsworthensis*; TF, *Tannerella forsythensis*; TP, *Tissierella praeacuta*.

**Supplementary Table 1h** Comparison of 16S rRNA gene sequences of medically important anaerobic cocci

|     | AF   | AH   | AL   | AO   | AP   | AT   | AV   | CP   | FM   | GB   | ME   | PN   | PAs  | PHa  | PIn  | PIv  | PL   | PA   | PM   | RP   | VA   | VD   | VP   |
|-----|------|------|------|------|------|------|------|------|------|------|------|------|------|------|------|------|------|------|------|------|------|------|------|
| AF  | -    | 74.3 | 73.1 | 73.2 | 70.6 | 69.0 | 73.7 | 84.4 | 72.4 | 70.0 | 83.2 | 78.0 | 75.6 | 77.8 | 74.5 | 77.6 | 73.0 | 77.3 | 71.4 | 81.5 | 83.7 | 84.2 | 83.8 |
| AH  | 78.8 | -    | 89.8 | 91.0 | 90.8 | 89.1 | 95.9 | 73.9 | 81.7 | 80.0 | 75.7 | 69.7 | 81.7 | 82.3 | 82.3 | 79.5 | 81.0 | 79.5 | 82.3 | 78.8 | 69.6 | 73.2 | 72.8 |
| AL  | 80.0 | 92.4 | -    | 93.0 | 93.7 | 92.7 | 92.0 | 70.0 | 79.4 | 79.9 | 70.1 | 76.8 | 83.8 | 81.5 | 83.2 | 81.1 | 83.2 | 76.6 | 81.9 | 77.6 | 71.2 | 72.7 | 72.2 |
| AO  | 79.5 | 91.7 | 93.9 | -    | 94.2 | 93.1 | 93.0 | 70.7 | 78.8 | 77.7 | 76.4 | 70.2 | 81.6 | 81.3 | 82.1 | 80.7 | 83.2 | 79.6 | 82.2 | 78.5 | 69.3 | 72.0 | 72.0 |
| AP  | 78.7 | 92.7 | 95.2 | 94.7 | -    | 94.3 | 91.8 | 67.4 | 78.8 | 78.5 | 69.8 | 73.0 | 83.2 | 81.7 | 82.9 | 81.2 | 82.5 | 78.1 | 82.4 | 78.5 | 71.9 | 70.5 | 69.9 |
| AT  | 78.2 | 92.6 | 95.1 | 94.2 | 96.3 | -    | 91.5 | 69.9 | 80.5 | 78.5 | 73.2 | 73.2 | 82.1 | 81.3 | 82.1 | 82.1 | 82.1 | 79.4 | 82.4 | 78.1 | 72.0 | 72.7 | 72.7 |
| AV  | 79.0 | 95.7 | 92.5 | 92.6 | 92.5 | 92.5 | -    | 69.9 | 81.3 | 79.6 | 77.7 | 70.2 | 82.3 | 82.8 | 82.7 | 81.3 | 82.7 | 79.3 | 84.9 | 78.6 | 72.0 | 72.6 | 72.1 |
| CP  | 86.4 | 78.2 | 78.0 | 78.2 | 77.9 | 77.9 | 76.7 | -    | 79.0 | 63.4 | 80.9 | 76.1 | 73.6 | 75.5 | 74.5 | 74.4 | 72.0 | 79.0 | 78.6 | 79.0 | 80.7 | 80.7 | 80.4 |
| FM  | 80.7 | 83.3 | 83.4 | 83.0 | 82.6 | 83.6 | 83.7 | 80.5 | -    | 81.8 | 80.2 | 76.6 | 85.1 | 83.6 | 84.3 | 83.7 | 82.4 | 80.3 | 86.2 | 77.3 | 69.9 | 77.1 | 77.8 |
| GB  | 79.8 | 81.8 | 83.2 | 82.5 | 83.1 | 83.1 | 81.7 | 77.0 | 87.1 | -    | 63.3 | 63.8 | 76.9 | 76.7 | 76.9 | 81.9 | 76.5 | 75.9 | 80.9 | 72.1 | 64.7 | 66.2 | 67.1 |
| ME  | 85.9 | 79.0 | 78.0 | 77.9 | 78.1 | 79.0 | 77.9 | 85.9 | 81.2 | 76.2 | -    | 76.2 | 74.4 | 77.7 | 74.4 | 76.5 | 74.1 | 78.7 | 78.8 | 78.0 | 87.0 | 88.9 | 88.5 |
| PN  | 82.6 | 79.6 | 81.1 | 80.1 | 81.2 | 80.5 | 80.0 | 80.9 | 81.0 | 79.3 | 82.5 | -    | 77.2 | 74.6 | 76.1 | 76.8 | 75.1 | 76.3 | 74.7 | 79.0 | 77.2 | 76.1 | 76.0 |
| PAs | 78.7 | 84.1 | 85.8 | 84.8 | 85.4 | 85.3 | 84.5 | 77.9 | 86.4 | 83.4 | 77.3 | 83.0 | -    | 87.3 | 97.0 | 88.1 | 87.8 | 80.4 | 83.4 | 77.1 | 75.1 | 72.5 | 72.2 |
| PHa | 78.9 | 84.7 | 85.3 | 84.2 | 85.2 | 85.2 | 84.6 | 78.7 | 85.0 | 81.6 | 78.7 | 79.4 | 88.6 | -    | 86.7 | 85.2 | 92.9 | 80.9 | 82.3 | 81.2 | 73.6 | 76.4 | 76.3 |
| PIn | 78.0 | 83.7 | 85.3 | 84.3 | 84.9 | 84.6 | 84.0 | 78.8 | 85.9 | 83.1 | 77.9 | 82.3 | 98.1 | 87.8 | -    | 87.3 | 86.7 | 81.0 | 83.8 | 77.1 | 75.8 | 71.3 | 72.7 |
| PIv | 79.8 | 82.5 | 84.4 | 85.1 | 84.7 | 85.0 | 83.5 | 78.5 | 86.1 | 85.5 | 79.4 | 82.2 | 89.0 | 86.4 | 88.5 | -    | 86.7 | 80.3 | 85.0 | 79.8 | 76.3 | 76.1 | 76.3 |
| PL  | 77.3 | 83.1 | 85.3 | 85.3 | 84.8 | 85.3 | 84.3 | 76.6 | 83.9 | 82.0 | 77.7 | 79.9 | 89.1 | 92.1 | 88.4 | 87.7 | -    | 77.5 | 81.7 | 78.4 | 74.3 | 73.9 | 73.8 |
| PA  | 79.8 | 81.6 | 79.6 | 82.3 | 80.7 | 81.6 | 81.1 | 80.2 | 82.2 | 79.7 | 79.4 | 81.9 | 82.8 | 81.8 | 82.6 | 83.0 | 80.4 | -    | 79.9 | 81.1 | 77.5 | 77.8 | 77.7 |
| PM  | 80.4 | 83.8 | 83.9 | 84.6 | 84.0 | 84.3 | 84.8 | 79.7 | 87.8 | 85.7 | 80.1 | 81.2 | 86.4 | 84.0 | 85.9 | 87.4 | 84.0 | 83.0 | -    | 80.1 | 70.5 | 78.7 | 78.6 |
| RP  | 81.5 | 80.7 | 79.9 | 80.5 | 80.7 | 80.7 | 80.2 | 79.9 | 80.6 | 78.4 | 80.4 | 82.6 | 81.3 | 81.6 | 80.9 | 82.3 | 80.6 | 83.6 | 82.3 | -    | 78.1 | 80.1 | 79.7 |
| VA  | 86.7 | 78.0 | 79.0 | 78.2 | 79.3 | 79.7 | 77.9 | 84.9 | 79.9 | 77.8 | 89.1 | 81.3 | 78.3 | 78.6 | 78.5 | 79.6 | 78.8 | 78.6 | 79.9 | 80.2 | -    | 97.0 | 96.4 |
| VD  | 86.7 | 78.9 | 79.4 | 79.0 | 78.8 | 80.0 | 78.1 | 85.1 | 80.2 | 78.1 | 89.7 | 80.9 | 77.4 | 79.5 | 77.0 | 79.7 | 78.4 | 79.3 | 80.0 | 80.2 | 98.3 | -    | 99.8 |
| VP  | 86.2 | 78.9 | 79.2 | 78.9 | 78.6 | 79.9 | 78.0 | 84.8 | 80.6 | 78.3 | 89.4 | 80.7 | 77.5 | 79.9 | 77.6 | 79.8 | 78.4 | 78.8 | 80.1 | 80.5 | 98.5 | 99.3 | -    |

The percentage similarities between the full 16S rRNA gene sequences of the species are indicated in the lower left triangle, the percentage differences between the 5' end 527-bp 16S rRNA gene sequences of the species are indicated in the upper right triangle. Percentage similarities of >97% were highlighted in gray.

Abbreviations: AF, *Acidaminococcus fermentans*; AH, *Anaerococcus hydrogenalis*; AL, *Anaerococcus lactolyticus*; AO, *Anaerococcus octavius*; AP, *Anaerococcus prevotii*; AT, *Anaerococcus tetradius*; AV, *Anaerococcus vaginalis*; CP, *Centipeda periodontii*; FM, *Fingoldia magna*; GB, *Gallicola barnesae*; ME, *Megasphaera elsdenii*; PN, *Peptococcus niger*; PAs, *Peptoniphilus asaccharolyticus*; PHa, *Peptoniphilus harei*; PIn, *Peptoniphilus indolicus*; PIv, *Peptoniphilus ivorii*; PL, *Peptoniphilus lacrimalis*; PA, *Peptostreptococcus anaerobius*; PM, *Peptostreptococcus micros*; RP, *Ruminococcus productus*; VA, *Veillonella atypical*; VD, *Veillonella dispar*; VP, *Veillonella parvula*.

**Supplementary Table 2** Usefulness of full 16S rRNA gene sequence, 5' end 527-bp 16S rRNA gene sequence and the existing MicroSeq 16S rDNA bacterial identification system databases for identification of medically important anaerobic Gram-positive rods

| Bacteria                             | Full 16S rRNA gene sequence           |                                                                                        |                                                                                        | 5' end 527-bp 16S rRNA gene sequence  |                                                                                                 |                                                                                       |
|--------------------------------------|---------------------------------------|----------------------------------------------------------------------------------------|----------------------------------------------------------------------------------------|---------------------------------------|-------------------------------------------------------------------------------------------------|---------------------------------------------------------------------------------------|
|                                      | Usefulness for species identification | Medically important bacteria with similar (<3% difference) full 16S rRNA gene sequence | Usefulness of existing Microseq full 16S rDNA bacterial identification system database | Usefulness for species identification | Medically important bacteria with similar (<3% difference) 5' end 527-bp 16S rRNA gene sequence | Usefulness of existing Microseq 500 16S rDNA bacterial identification system database |
| <i>Actinobaculum schaalii</i>        | √                                     |                                                                                        | × <sup>a</sup>                                                                         | √                                     |                                                                                                 | × <sup>d</sup>                                                                        |
| <i>Actinobaculum suis</i>            | √                                     |                                                                                        | × <sup>a</sup>                                                                         | √                                     |                                                                                                 | × <sup>d</sup>                                                                        |
| <i>Actinomyces bovis</i>             | ?                                     | <i>A. urogenitalis</i>                                                                 | ? <sup>c</sup>                                                                         | ?                                     | <i>A. urogenitalis</i>                                                                          | ? <sup>f</sup>                                                                        |
| <i>Actinomyces bowdenii</i>          | ?                                     | <i>A. viscosus</i>                                                                     | × <sup>a</sup>                                                                         | ?                                     | <i>A. viscosus</i>                                                                              | × <sup>d</sup>                                                                        |
| <i>Actinomyces canis</i>             | √                                     |                                                                                        | × <sup>a</sup>                                                                         | √                                     |                                                                                                 | × <sup>d</sup>                                                                        |
| <i>Actinomyces catuli</i>            | √                                     |                                                                                        | × <sup>a</sup>                                                                         | √                                     |                                                                                                 | × <sup>d</sup>                                                                        |
| <i>Actinomyces denticolens</i>       | √                                     |                                                                                        | × <sup>a</sup>                                                                         | √                                     |                                                                                                 | × <sup>d</sup>                                                                        |
| <i>Actinomyces europaeus</i>         | √                                     |                                                                                        | × <sup>a</sup>                                                                         | √                                     |                                                                                                 | × <sup>d</sup>                                                                        |
| <i>Actinomyces funkei</i>            | ?                                     | <i>A. hyovaginalis</i>                                                                 | × <sup>a</sup>                                                                         | √                                     |                                                                                                 | × <sup>d</sup>                                                                        |
| <i>Actinomyces georgiae</i>          | ?                                     | <i>A. meyeri</i>                                                                       | × <sup>a</sup>                                                                         | √                                     |                                                                                                 | × <sup>d</sup>                                                                        |
| <i>Actinomyces gerencseriae</i>      | √                                     |                                                                                        | × <sup>a</sup>                                                                         | √                                     |                                                                                                 | × <sup>d</sup>                                                                        |
| <i>Actinomyces graevenitzii</i>      | √                                     |                                                                                        | × <sup>a</sup>                                                                         | √                                     |                                                                                                 | × <sup>d</sup>                                                                        |
| <i>Actinomyces hordeovulneris</i>    | √                                     |                                                                                        | × <sup>a</sup>                                                                         | √                                     |                                                                                                 | × <sup>d</sup>                                                                        |
| <i>Actinomyces howellii</i>          | √                                     |                                                                                        | √                                                                                      | √                                     |                                                                                                 | √                                                                                     |
| <i>Actinomyces hyovaginalis</i>      | ?                                     | <i>A. funkei</i>                                                                       | × <sup>a</sup>                                                                         | √                                     |                                                                                                 | × <sup>d</sup>                                                                        |
| <i>Actinomyces israelii</i>          | √                                     |                                                                                        | × <sup>a</sup>                                                                         | √                                     |                                                                                                 | √                                                                                     |
| <i>Actinomyces meyeri</i>            | ?                                     | <i>A. georgiae, A. odontolyticus, A. turicensis</i>                                    | ? <sup>c</sup>                                                                         | ×                                     | <i>A. odontolyticus, A. turicensis</i>                                                          | × <sup>c</sup>                                                                        |
| <i>Actinomyces naeslundii</i>        | ×                                     | <i>A. viscosus</i>                                                                     | × <sup>a</sup>                                                                         | ?                                     | <i>A. viscosus</i>                                                                              | ? <sup>f</sup>                                                                        |
| <i>Actinomyces neuui</i>             | √                                     |                                                                                        | √                                                                                      | √                                     |                                                                                                 | √                                                                                     |
| <i>Actinomyces odontolyticus</i>     | ×                                     | <i>A. meyeri, A. turicensis</i>                                                        | × <sup>a</sup>                                                                         | ×                                     | <i>A. meyeri, A. turicensis</i>                                                                 | × <sup>d</sup>                                                                        |
| <i>Actinomyces radidentis</i>        | √                                     |                                                                                        | × <sup>a</sup>                                                                         | √                                     |                                                                                                 | × <sup>d</sup>                                                                        |
| <i>Actinomyces radingae</i>          | √                                     |                                                                                        | √                                                                                      | √                                     |                                                                                                 | √                                                                                     |
| <i>Actinomyces slackii</i>           | √                                     |                                                                                        | √                                                                                      | √                                     |                                                                                                 | √                                                                                     |
| <i>Actinomyces turicensis</i>        | ×                                     | <i>A. meyeri, A. odontolyticus</i>                                                     | × <sup>a</sup>                                                                         | ×                                     | <i>A. meyeri, A. odontolyticus</i>                                                              | × <sup>d</sup>                                                                        |
| <i>Actinomyces urogenitalis</i>      | ?                                     | <i>A. bovis</i>                                                                        | × <sup>a</sup>                                                                         | ?                                     | <i>A. bovis</i>                                                                                 | × <sup>d</sup>                                                                        |
| <i>Actinomyces viscosus</i>          | ×                                     | <i>A. bowdenii, A. naeslundii</i>                                                      | × <sup>b</sup>                                                                         | ?                                     | <i>A. bowdenii, A. naeslundii</i>                                                               | ? <sup>f</sup>                                                                        |
| <i>Arcanobacterium bernardiae</i>    | ?                                     | <i>A. pyogenes</i>                                                                     | ? <sup>c</sup>                                                                         | √                                     |                                                                                                 | √                                                                                     |
| <i>Arcanobacterium haemolyticum</i>  | ?                                     | <i>A. phocae</i>                                                                       | ? <sup>c</sup>                                                                         | ?                                     | <i>A. phocae</i>                                                                                | ? <sup>f</sup>                                                                        |
| <i>Arcanobacterium phocae</i>        | ?                                     | <i>A. haemolyticum</i>                                                                 | × <sup>a</sup>                                                                         | ?                                     | <i>A. haemolyticum</i>                                                                          | × <sup>d</sup>                                                                        |
| <i>Arcanobacterium pluranimalium</i> | √                                     |                                                                                        | × <sup>a</sup>                                                                         | √                                     |                                                                                                 | × <sup>d</sup>                                                                        |
| <i>Arcanobacterium pyogenes</i>      | ?                                     | <i>A. bernardiae</i>                                                                   | ? <sup>c</sup>                                                                         | √                                     |                                                                                                 | √                                                                                     |
| <i>Atopobium fossor</i>              | ?                                     | <i>A. minutum</i>                                                                      | × <sup>a</sup>                                                                         | √                                     |                                                                                                 | √                                                                                     |
| <i>Atopobium minutum</i>             | ?                                     | <i>A. fossor</i>                                                                       | ? <sup>c</sup>                                                                         | √                                     |                                                                                                 | √                                                                                     |
| <i>Atopobium parvulum</i>            | √                                     |                                                                                        | × <sup>a</sup>                                                                         | √                                     |                                                                                                 | × <sup>d</sup>                                                                        |
| <i>Atopobium rimae</i>               | √                                     |                                                                                        | √                                                                                      | √                                     |                                                                                                 | √                                                                                     |
| <i>Atopobium vaginae</i>             | √                                     |                                                                                        | × <sup>a</sup>                                                                         | √                                     |                                                                                                 | × <sup>d</sup>                                                                        |

|                                     |   |                                                             |                |   |                                                                          |                |
|-------------------------------------|---|-------------------------------------------------------------|----------------|---|--------------------------------------------------------------------------|----------------|
| <i>Bifidobacterium adolescentis</i> | √ |                                                             | × <sup>a</sup> | √ |                                                                          | × <sup>d</sup> |
| <i>Bifidobacterium bifidum</i>      | √ |                                                             | × <sup>a</sup> | √ |                                                                          | √              |
| <i>Bifidobacterium breve</i>        | ? | <i>B. infantis</i> , <i>B. longum</i>                       | × <sup>a</sup> | √ |                                                                          | × <sup>d</sup> |
| <i>Bifidobacterium catenulatum</i>  | ? | <i>B. dentium</i>                                           | ? <sup>c</sup> | √ |                                                                          | √              |
| <i>Bifidobacterium dentium</i>      | ? | <i>B. catenulatum</i>                                       | × <sup>a</sup> | √ |                                                                          | × <sup>d</sup> |
| <i>Bifidobacterium globosum</i>     | √ |                                                             | × <sup>a</sup> | √ |                                                                          | × <sup>d</sup> |
| <i>Bifidobacterium infantis</i>     | × | <i>B. longum</i> , <i>B. breve</i>                          | × <sup>b</sup> | × | <i>B. longum</i>                                                         | × <sup>e</sup> |
| <i>Bifidobacterium longum</i>       | × | <i>B. infantis</i> , <i>B. breve</i>                        | × <sup>b</sup> | × | <i>B. infantis</i>                                                       | × <sup>e</sup> |
| <i>Bulleidia extracta</i>           | √ |                                                             | × <sup>a</sup> | √ |                                                                          | × <sup>d</sup> |
| <i>Catenibacterium mitsuokai</i>    | √ |                                                             | × <sup>a</sup> | √ |                                                                          | × <sup>d</sup> |
| <i>Clostridium aminovalericum</i>   | √ |                                                             | × <sup>a</sup> | √ |                                                                          | × <sup>d</sup> |
| <i>Clostridium argentinense</i>     | × | <i>C. subterminale</i>                                      | × <sup>b</sup> | × | <i>C. subterminale</i>                                                   | × <sup>e</sup> |
| <i>Clostridium baratii</i>          | √ |                                                             | √              | √ |                                                                          | √              |
| <i>Clostridium beijerinckii</i>     | × | <i>C. butyricum</i>                                         | × <sup>b</sup> | × | <i>C. celatum</i> , <i>C. butyricum</i>                                  | × <sup>e</sup> |
| <i>Clostridium bifermentans</i>     | ? | <i>C. ghonii</i> , <i>C. sordellii</i>                      | ? <sup>c</sup> | ? | <i>C. ghonii</i> , <i>C. sordellii</i>                                   | ? <sup>f</sup> |
| <i>Clostridium botulinum</i>        | × | <i>C. sporogenes</i>                                        | × <sup>b</sup> | × | <i>C. sporogenes</i>                                                     | × <sup>e</sup> |
| <i>Clostridium butyricum</i>        | × | <i>C. beijerinckii</i>                                      | × <sup>a</sup> | × | <i>C. beijerinckii</i>                                                   | × <sup>d</sup> |
| <i>Clostridium cadaveris</i>        | √ |                                                             | √              | √ |                                                                          | √              |
| <i>Clostridium carnis</i>           | × | <i>C. chauvoei</i> , <i>C. septicum</i> , <i>C. tertium</i> | × <sup>a</sup> | × | <i>C. chauvoei</i> , <i>C. septicum</i> , <i>C. tertium</i>              | × <sup>d</sup> |
| <i>Clostridium celatum</i>          | × | <i>C. disporicum</i>                                        | × <sup>a</sup> | ? | <i>C. beijerinckii</i> , <i>C. disporicum</i> , <i>C. paraputrificum</i> | × <sup>d</sup> |
| <i>Clostridium chauvoei</i>         | × | <i>C. septicum</i> , <i>C. tertium</i> , <i>C. carnis</i>   | × <sup>a</sup> | × | <i>C. septicum</i> , <i>C. tertium</i> , <i>C. carnis</i>                | × <sup>e</sup> |
| <i>Clostridium clostridioforme</i>  | √ |                                                             | √              | √ |                                                                          | √              |
| <i>Clostridium coccoides</i>        | √ |                                                             | × <sup>a</sup> | √ |                                                                          | × <sup>d</sup> |
| <i>Clostridium cochlearium</i>      | × | <i>C. tetani</i>                                            | × <sup>b</sup> | × | <i>C. tetani</i>                                                         | × <sup>e</sup> |
| <i>Clostridium difficile</i>        | √ |                                                             | √              | √ |                                                                          | √              |
| <i>Clostridium disporicum</i>       | × | <i>C. celatum</i>                                           | × <sup>a</sup> | √ | <i>C. celatum</i>                                                        | × <sup>d</sup> |
| <i>Clostridium fallax</i>           | √ |                                                             | √              | √ |                                                                          | √              |
| <i>Clostridium ghonii</i>           | × | <i>C. sordellii</i> , <i>C. bifermentans</i>                | × <sup>b</sup> | × | <i>C. sordellii</i> , <i>C. bifermentans</i>                             | × <sup>e</sup> |
| <i>Clostridium glycolicum</i>       | √ |                                                             | × <sup>a</sup> | √ |                                                                          | × <sup>d</sup> |
| <i>Clostridium haemolyticum</i>     | × | <i>C. novyi</i>                                             | × <sup>a</sup> | × | <i>C. novyi</i>                                                          | × <sup>d</sup> |
| <i>Clostridium hiranonis</i>        | √ |                                                             | × <sup>a</sup> | √ |                                                                          | × <sup>d</sup> |
| <i>Clostridium histolyticum</i>     | ? | <i>C. limosum</i>                                           | ? <sup>c</sup> | √ |                                                                          | √              |
| <i>Clostridium hylemonae</i>        | √ |                                                             | × <sup>a</sup> | √ |                                                                          | × <sup>d</sup> |
| <i>Clostridium indolis</i>          | √ |                                                             | × <sup>a</sup> | √ |                                                                          | × <sup>d</sup> |
| <i>Clostridium innocuum</i>         | √ |                                                             | √              | √ |                                                                          | √              |
| <i>Clostridium limosum</i>          | ? | <i>C. histolyticum</i>                                      | ? <sup>c</sup> | √ |                                                                          | √              |
| <i>Clostridium malenominatum</i>    | √ |                                                             | √              | √ |                                                                          | √              |
| <i>Clostridium manganotii</i>       | √ |                                                             | √              | √ |                                                                          | √              |
| <i>Clostridium novyi</i>            | × | <i>C. haemolyticum</i>                                      | × <sup>a</sup> | × | <i>C. haemolyticum</i>                                                   | × <sup>e</sup> |
| <i>Clostridium paraputrificum</i>   | √ |                                                             | √              | ? | <i>C. celatum</i>                                                        | ? <sup>f</sup> |
| <i>Clostridium perfringens</i>      | √ |                                                             | √              | √ |                                                                          | √              |
| <i>Clostridium ramosum</i>          | √ |                                                             | √              | √ |                                                                          | √              |
| <i>Clostridium septicum</i>         | × | <i>C. chauvoei</i> , <i>C. carnis</i> , <i>C. tertium</i>   | × <sup>a</sup> | × | <i>C. chauvoei</i> , <i>C. carnis</i> , <i>C. tertium</i>                | × <sup>d</sup> |
| <i>Clostridium sordellii</i>        | × | <i>C. ghonii</i> , <i>C.</i>                                | × <sup>b</sup> | × | <i>C. ghonii</i> , <i>C.</i>                                             | × <sup>e</sup> |

|                                                    |   |                                                                            |                |                                                        |                |
|----------------------------------------------------|---|----------------------------------------------------------------------------|----------------|--------------------------------------------------------|----------------|
|                                                    |   | <i>bifermentans</i>                                                        |                | <i>bifermentans</i>                                    |                |
| <i>Clostridium sphenoides</i>                      | √ |                                                                            | √              |                                                        | √              |
| <i>Clostridium spiroforme</i>                      | √ |                                                                            | × <sup>a</sup> |                                                        | × <sup>d</sup> |
| <i>Clostridium sporogenes</i>                      | × | <i>C. botulinum</i>                                                        | × <sup>b</sup> | <i>C. botulinum</i>                                    | × <sup>e</sup> |
| <i>Clostridium sporosphaeroides</i>                | √ |                                                                            | √              |                                                        | √              |
| <i>Clostridium subterminale</i>                    | × | <i>C. argentinense</i>                                                     | × <sup>b</sup> | <i>C. argentinense</i>                                 | × <sup>e</sup> |
| <i>Clostridium symbiosum</i>                       | √ |                                                                            | × <sup>a</sup> |                                                        | × <sup>d</sup> |
| <i>Clostridium tertium</i>                         | × | <i>C. chauvoei, C. carnis, C. septicum</i>                                 | × <sup>b</sup> | <i>C. chauvoei, C. carnis, C. septicum</i>             | × <sup>e</sup> |
| <i>Clostridium tetani</i>                          | × | <i>C. cochlearium</i>                                                      | × <sup>b</sup> | <i>C. cochlearium</i>                                  | × <sup>e</sup> |
| <i>Collinsella aerofaciens</i>                     | √ |                                                                            | × <sup>a</sup> |                                                        | × <sup>d</sup> |
| <i>Collinsella intestinalis</i>                    | ? | <i>C. stercoris</i>                                                        | × <sup>a</sup> | <i>C. stercoris</i>                                    | × <sup>d</sup> |
| <i>Collinsella stercoris</i>                       | ? | <i>C. intestinalis</i>                                                     | × <sup>a</sup> | <i>C. intestinalis</i>                                 | × <sup>d</sup> |
| <i>Cryptobacterium curtum</i>                      | √ |                                                                            | × <sup>a</sup> |                                                        | × <sup>d</sup> |
| <i>Eggerthella lenta</i>                           | √ |                                                                            | √              |                                                        | √              |
| <i>Eubacterium brachy</i>                          | √ |                                                                            | × <sup>a</sup> |                                                        | × <sup>d</sup> |
| <i>Eubacterium budayi</i>                          | × | <i>E. moniliforme, E. multiforme, E. nitritogenes</i>                      | × <sup>a</sup> | <i>E. moniliforme, E. multiforme, E. nitritogenes</i>  | × <sup>d</sup> |
| <i>Eubacterium saburreum</i>                       | √ |                                                                            | × <sup>a</sup> |                                                        | × <sup>d</sup> |
| <i>Eubacterium combesii</i>                        | √ |                                                                            | × <sup>a</sup> |                                                        | × <sup>d</sup> |
| <i>Eubacterium contortum</i>                       | √ |                                                                            | √              |                                                        | √              |
| <i>Eubacterium infirmum</i>                        | × | <i>E. sulci</i>                                                            | × <sup>a</sup> | <i>E. sulci</i>                                        | × <sup>d</sup> |
| <i>Eubacterium minutum</i>                         | √ |                                                                            | × <sup>a</sup> |                                                        | × <sup>d</sup> |
| <i>Eubacterium moniliforme</i>                     | × | <i>E. budayi, E. multiforme, E. nitritogenes</i>                           | × <sup>a</sup> | <i>E. budayi, E. nitritogenes</i>                      | × <sup>d</sup> |
| <i>Eubacterium multiforme</i>                      | × | <i>E. budayi, E. moniliforme, E. nitritogenes</i>                          | × <sup>b</sup> | <i>E. budayi</i>                                       | × <sup>e</sup> |
| <i>Eubacterium nitritogenes</i>                    | × | <i>E. budayi, E. moniliforme, E. multiforme</i>                            | × <sup>a</sup> | <i>E. budayi, E. moniliforme</i>                       | × <sup>d</sup> |
| <i>Eubacterium nodatum</i>                         | √ |                                                                            | × <sup>a</sup> |                                                        | × <sup>d</sup> |
| <i>Eubacterium saphenum</i>                        | √ |                                                                            | × <sup>a</sup> |                                                        | × <sup>d</sup> |
| <i>Eubacterium sulci</i>                           | × | <i>E. infirmum</i>                                                         | × <sup>a</sup> | <i>E. infirmum</i>                                     | × <sup>d</sup> |
| <i>Eubacterium tenue</i>                           | √ |                                                                            | √              |                                                        | √              |
| <i>Eubacterium yurii</i> subsp. <i>margaretiae</i> | × | <i>E. yurii</i> subsp. <i>schtitka, E. yurii</i> subsp. <i>yurii</i>       | × <sup>a</sup> | <i>E. yurii</i> subsp. <i>yurii</i>                    | × <sup>d</sup> |
| <i>Eubacterium yurii</i> subsp. <i>schtitka</i>    | ? | <i>E. yurii</i> subsp. <i>margaretiae, E. yurii</i> subsp. <i>yurii</i>    | × <sup>a</sup> |                                                        | × <sup>d</sup> |
| <i>Eubacterium yurii</i> subsp. <i>yurii</i>       | × | <i>E. yurii</i> subsp. <i>margaretiae, E. yurii</i> subsp. <i>schtitka</i> | × <sup>a</sup> | <i>E. yurii</i> subsp. <i>margaretiae</i>              | × <sup>d</sup> |
| <i>Holdemania filiformis</i>                       | √ |                                                                            | × <sup>a</sup> |                                                        | × <sup>d</sup> |
| <i>Lactobacillus acidophilus</i>                   | √ |                                                                            | √              |                                                        | √              |
| <i>Lactobacillus casei</i>                         | × | <i>L. rhamnosus</i>                                                        | × <sup>b</sup> | <i>L. rhamnosus</i>                                    | ? <sup>f</sup> |
| <i>Lactobacillus catenaformis</i>                  | √ |                                                                            | × <sup>a</sup> |                                                        | × <sup>d</sup> |
| <i>Lactobacillus rhamnosus</i>                     | × | <i>L. casei</i>                                                            | × <sup>b</sup> | <i>L. casei</i>                                        | ? <sup>f</sup> |
| <i>Lactobacillus vitulinus</i>                     | √ |                                                                            | × <sup>a</sup> |                                                        | × <sup>d</sup> |
| <i>Mobiluncus curtisii</i> subsp. <i>curtisii</i>  | × | <i>M. curtisii</i> subsp. <i>holmesii, M. mulieris</i>                     | × <sup>b</sup> | <i>M. mulieris, M. curtisii</i> subsp. <i>holmesii</i> | × <sup>e</sup> |
| <i>Mobiluncus curtisii</i> subsp. <i>holmesii</i>  | × | <i>M. mulieris, M. curtisii</i> subsp. <i>curtisii</i>                     | × <sup>b</sup> | <i>M. curtisii</i> subsp. <i>curtisii, M. mulieris</i> | × <sup>e</sup> |
| <i>Mobiluncus mulieris</i>                         | ? | <i>M. curtisii</i> subsp.                                                  | ? <sup>c</sup> | <i>M. curtisii</i> subsp.                              | ? <sup>f</sup> |

|                                       |   | <i>holmesii</i> , <i>M. curtisii</i> subsp. <i>curtisii</i> |                |   | <i>curtisii</i> , <i>M. curtisii</i> subsp. <i>holmesii</i> |                |
|---------------------------------------|---|-------------------------------------------------------------|----------------|---|-------------------------------------------------------------|----------------|
| <i>Mogibacterium pumilum</i>          | × | <i>M. timidum</i> , <i>M. vescum</i>                        | × <sup>a</sup> | × | <i>M. vescum</i>                                            | × <sup>d</sup> |
| <i>Mogibacterium timidum</i>          | ? | <i>M. pumilum</i>                                           | × <sup>a</sup> | √ |                                                             | × <sup>d</sup> |
| <i>Mogibacterium vescum</i>           | × | <i>M. pumilum</i>                                           | × <sup>a</sup> | × | <i>M. pumilum</i>                                           | × <sup>d</sup> |
| <i>Olsenella uli</i>                  | √ |                                                             | × <sup>a</sup> | √ |                                                             | × <sup>d</sup> |
| <i>Propionibacterium acnes</i>        | √ |                                                             | √              | √ |                                                             | √              |
| <i>Propionibacterium avidum</i>       | √ |                                                             | √              | √ |                                                             | √              |
| <i>Propionibacterium granulosum</i>   | √ |                                                             | × <sup>a</sup> | √ |                                                             | × <sup>d</sup> |
| <i>Propionibacterium propionicum</i>  | √ |                                                             | √              | √ |                                                             | √              |
| <i>Pseudoramibacter alactolyticus</i> | √ |                                                             | × <sup>a</sup> | √ |                                                             | × <sup>d</sup> |
| <i>Slackia exigua</i>                 | √ |                                                             | × <sup>a</sup> | √ |                                                             | × <sup>d</sup> |
| <i>Slackia heliotrinireducens</i>     | √ |                                                             | × <sup>a</sup> | √ |                                                             | × <sup>d</sup> |

√, >3% difference between the 16S rRNA gene sequence of the species and those of other medically important bacteria

?, 2-3% difference between the 16S rRNA gene sequence of the species and that of a closely related medically important bacterium

×, <2% difference between the 16S rRNA gene sequence of the species and that of a closely related medically important bacterium

×<sup>a</sup>, the species is not included in the existing MicroSeq full 16S rDNA bacterial identification system database

×<sup>b</sup>, although the species is included in the existing MicroSeq full 16S rDNA bacterial identification system database, the high 16S rRNA gene sequence similarity (>98% nucleotide identity) between the species and a closely related species does not allow them to be distinguished confidently

?<sup>c</sup>, although the species is included in the existing MicroSeq full 16S rDNA bacterial identification system database, 2-3% difference is observed between the 16S rRNA gene of the species and a closely related species

×<sup>d</sup>, the species is not included in the existing MicroSeq 500 16S rDNA bacterial identification system database

×<sup>e</sup>, although the species is included in the existing MicroSeq 500 16S rDNA bacterial identification system database, the high 16S rRNA gene sequence similarity (>98% nucleotide identity) between the species and a closely related species does not allow them to be distinguished confidently

?<sup>f</sup>, although the species is included in the existing MicroSeq 500 16S rDNA bacterial identification system database, 2-3% difference is observed between the 16S rRNA gene of the species and a closely related species

**Supplementary Table 3** Usefulness of full 16S rRNA gene sequence, 5' end 527-bp 16S rRNA gene sequence and the existing MicroSeq 16S rDNA bacterial identification system databases for identification of medically important anaerobic Gram-negative rods

| Bacteria                                              | Full 16S rRNA gene sequence           |                                                                                                                                                                    |                                                                                        | 5' end 527-bp 16S rRNA gene sequence  |                                                                                                                                                                    |                                                                                       |
|-------------------------------------------------------|---------------------------------------|--------------------------------------------------------------------------------------------------------------------------------------------------------------------|----------------------------------------------------------------------------------------|---------------------------------------|--------------------------------------------------------------------------------------------------------------------------------------------------------------------|---------------------------------------------------------------------------------------|
|                                                       | Usefulness for species identification | Medically important bacteria with similar (<3% difference) full 16S rRNA gene sequence                                                                             | Usefulness of existing Microseq full 16S rDNA bacterial identification system database | Usefulness for species identification | Medically important bacteria with similar (<3% difference) 5' end 527-bp 16S rRNA gene sequence                                                                    | Usefulness of existing Microseq 500 16S rDNA bacterial identification system database |
| <i>Alistipes putredinis</i>                           | √                                     |                                                                                                                                                                    | × <sup>a</sup>                                                                         | √                                     |                                                                                                                                                                    | × <sup>d</sup>                                                                        |
| <i>Anaerobiospirillum succiniciproducens</i>          | √                                     |                                                                                                                                                                    | × <sup>a</sup>                                                                         | √                                     |                                                                                                                                                                    | × <sup>d</sup>                                                                        |
| <i>Anaerobiospirillum thomasi</i>                     | √                                     |                                                                                                                                                                    | × <sup>a</sup>                                                                         | √                                     |                                                                                                                                                                    | × <sup>d</sup>                                                                        |
| <i>Bacteroides caccae</i>                             | √                                     |                                                                                                                                                                    | √                                                                                      | √                                     |                                                                                                                                                                    | √                                                                                     |
| <i>Bacteroides capillosus</i>                         | √                                     |                                                                                                                                                                    | × <sup>a</sup>                                                                         | √                                     |                                                                                                                                                                    | × <sup>d</sup>                                                                        |
| <i>Bacteroides distasonis</i>                         | √                                     |                                                                                                                                                                    | √                                                                                      | √                                     |                                                                                                                                                                    | √                                                                                     |
| <i>Bacteroides eggerthii</i>                          | √                                     |                                                                                                                                                                    | √                                                                                      | √                                     |                                                                                                                                                                    | √                                                                                     |
| <i>Bacteroides fragilis</i>                           | √                                     |                                                                                                                                                                    | √                                                                                      | √                                     |                                                                                                                                                                    | √                                                                                     |
| <i>Bacteroides merdae</i>                             | √                                     |                                                                                                                                                                    | √                                                                                      | √                                     |                                                                                                                                                                    | √                                                                                     |
| <i>Bacteroides ovatus</i>                             | √                                     |                                                                                                                                                                    | √                                                                                      | √                                     |                                                                                                                                                                    | √                                                                                     |
| <i>Bacteroides pyogenes</i>                           | ×                                     | <i>B. tectus</i>                                                                                                                                                   | × <sup>a</sup>                                                                         | ×                                     | <i>B. tectus</i>                                                                                                                                                   | × <sup>d</sup>                                                                        |
| <i>Bacteroides splanchnicus</i>                       | √                                     |                                                                                                                                                                    | × <sup>a</sup>                                                                         | √                                     |                                                                                                                                                                    | × <sup>d</sup>                                                                        |
| <i>Bacteroides stercoris</i>                          | √                                     |                                                                                                                                                                    | √                                                                                      | √                                     |                                                                                                                                                                    | √                                                                                     |
| <i>Bacteroides tectus</i>                             | ×                                     | <i>B. pyogenes</i>                                                                                                                                                 | × <sup>a</sup>                                                                         | ×                                     | <i>B. pyogenes</i>                                                                                                                                                 | × <sup>d</sup>                                                                        |
| <i>Bacteroides thetaiotaomicron</i>                   | √                                     |                                                                                                                                                                    | √                                                                                      | √                                     |                                                                                                                                                                    | √                                                                                     |
| <i>Bacteroides uniformis</i>                          | √                                     |                                                                                                                                                                    | √                                                                                      | √                                     |                                                                                                                                                                    | √                                                                                     |
| <i>Bacteroides ureolyticus</i>                        | √                                     |                                                                                                                                                                    | √                                                                                      | √                                     |                                                                                                                                                                    | √                                                                                     |
| <i>Bacteroides vulgatus</i>                           | √                                     |                                                                                                                                                                    | √                                                                                      | √                                     |                                                                                                                                                                    | √                                                                                     |
| <i>Bilophila wadsworthia</i>                          | √                                     |                                                                                                                                                                    | × <sup>a</sup>                                                                         | √                                     |                                                                                                                                                                    | × <sup>d</sup>                                                                        |
| <i>Butyrivibrio fibrisolvens</i>                      | √                                     |                                                                                                                                                                    | × <sup>a</sup>                                                                         | √                                     |                                                                                                                                                                    | × <sup>d</sup>                                                                        |
| <i>Desulfovibrio piger</i>                            | √                                     |                                                                                                                                                                    | × <sup>a</sup>                                                                         | √                                     |                                                                                                                                                                    | × <sup>d</sup>                                                                        |
| <i>Dialister pneumosintes</i>                         | √                                     |                                                                                                                                                                    | × <sup>a</sup>                                                                         | √                                     |                                                                                                                                                                    | × <sup>d</sup>                                                                        |
| <i>Faecalibacterium prausnitzii</i>                   | √                                     |                                                                                                                                                                    | × <sup>a</sup>                                                                         | √                                     |                                                                                                                                                                    | × <sup>d</sup>                                                                        |
| <i>Filifactor alocis</i>                              | √                                     |                                                                                                                                                                    | × <sup>a</sup>                                                                         | √                                     |                                                                                                                                                                    | √                                                                                     |
| <i>Fusobacterium gonidiaformans</i>                   | ?                                     | <i>F. necrophorum</i>                                                                                                                                              | ? <sup>c</sup>                                                                         | ?                                     | <i>F. necrophorum</i>                                                                                                                                              | ? <sup>f</sup>                                                                        |
| <i>Fusobacterium mortiferum</i>                       | ×                                     | <i>F. ulcerans</i> , <i>F. varium</i>                                                                                                                              | × <sup>b</sup>                                                                         | ×                                     | <i>F. ulcerans</i> , <i>F. varium</i>                                                                                                                              | × <sup>e</sup>                                                                        |
| <i>Fusobacterium naviforme</i>                        | ×                                     | <i>F. nucleatum</i> subsp. <i>animalis</i> , <i>F. nucleatum</i> subsp. <i>nucleatum</i> , <i>F. nucleatum</i> subsp. <i>polymorphum</i> , <i>F. periodonticum</i> | × <sup>a</sup>                                                                         | ×                                     | <i>F. nucleatum</i> subsp. <i>animalis</i> , <i>F. nucleatum</i> subsp. <i>nucleatum</i> , <i>F. nucleatum</i> subsp. <i>polymorphum</i> , <i>F. periodonticum</i> | × <sup>d</sup>                                                                        |
| <i>Fusobacterium necrophorum</i>                      | ?                                     | <i>F. gonidiaformans</i>                                                                                                                                           | ? <sup>c</sup>                                                                         | ?                                     | <i>F. gonidiaformans</i>                                                                                                                                           | ? <sup>f</sup>                                                                        |
| <i>Fusobacterium nucleatum</i> subsp. <i>animalis</i> | ×                                     | <i>F. naviforme</i> , <i>F. nucleatum</i> subsp. <i>nucleatum</i> , <i>F. nucleatum</i> subsp. <i>polymorphum</i> , <i>F. periodonticum</i>                        | × <sup>b</sup>                                                                         | ?                                     | <i>F. naviforme</i> , <i>F. nucleatum</i> subsp. <i>nucleatum</i>                                                                                                  | ? <sup>f</sup>                                                                        |

|                                                          |   |                                                                                                                                                                |                |   |                                                                                                                                            |                |
|----------------------------------------------------------|---|----------------------------------------------------------------------------------------------------------------------------------------------------------------|----------------|---|--------------------------------------------------------------------------------------------------------------------------------------------|----------------|
| <i>Fusobacterium nucleatum</i> subsp. <i>nucleatum</i>   | × | <i>F. naviforme</i> , <i>F. nucleatum</i> subsp. <i>animalis</i> , <i>F. nucleatum</i> subsp. <i>polymorphum</i> , <i>F. periodonticum</i>                     | × <sup>b</sup> | × | <i>F. naviforme</i> , <i>F. nucleatum</i> subsp. <i>animalis</i> , <i>F. nucleatum</i> subsp. <i>polymorphum</i> , <i>F. periodonticum</i> | × <sup>e</sup> |
| <i>Fusobacterium nucleatum</i> subsp. <i>polymorphum</i> | × | <i>F. naviforme</i> , <i>F. nucleatum</i> subsp. <i>animalis</i> , <i>F. nucleatum</i> subsp. <i>periodonticum</i>                                             | × <sup>a</sup> | × | <i>F. naviforme</i> , <i>F. nucleatum</i> subsp. <i>nucleatum</i> , <i>F. periodonticum</i>                                                | × <sup>d</sup> |
| <i>Fusobacterium periodonticum</i>                       | × | <i>F. naviforme</i> , <i>F. nucleatum</i> subsp. <i>animalis</i> , <i>F. nucleatum</i> subsp. <i>nucleatum</i> , <i>F. nucleatum</i> subsp. <i>polymorphum</i> | × <sup>b</sup> | × | <i>F. naviforme</i> , <i>F. nucleatum</i> subsp. <i>nucleatum</i> , <i>F. nucleatum</i> subsp. <i>polymorphum</i>                          | × <sup>e</sup> |
| <i>Fusobacterium russii</i>                              | √ |                                                                                                                                                                | √              | √ |                                                                                                                                            | √              |
| <i>Fusobacterium ulcerans</i>                            | × | <i>F. mortiferum</i> , <i>F. varium</i>                                                                                                                        | × <sup>b</sup> | × | <i>F. mortiferum</i> , <i>F. varium</i>                                                                                                    | × <sup>e</sup> |
| <i>Fusobacterium varium</i>                              | × | <i>F. mortiferum</i> , <i>F. ulcerans</i>                                                                                                                      | × <sup>b</sup> | × | <i>F. mortiferum</i> , <i>F. ulcerans</i>                                                                                                  | × <sup>e</sup> |
| <i>Johnsonella ignava</i>                                | √ |                                                                                                                                                                | × <sup>a</sup> | √ |                                                                                                                                            | × <sup>d</sup> |
| <i>Leptotrichia buccalis</i>                             | √ |                                                                                                                                                                | × <sup>a</sup> | √ |                                                                                                                                            | × <sup>d</sup> |
| <i>Megamonas hypermegale</i>                             | √ |                                                                                                                                                                | × <sup>a</sup> | √ |                                                                                                                                            | × <sup>d</sup> |
| <i>Porphyromonas asaccharolytica</i>                     | √ |                                                                                                                                                                | × <sup>a</sup> | √ |                                                                                                                                            | × <sup>d</sup> |
| <i>Porphyromonas cangingivalis</i>                       | √ |                                                                                                                                                                | × <sup>a</sup> | √ |                                                                                                                                            | × <sup>d</sup> |
| <i>Porphyromonas canoris</i>                             | √ |                                                                                                                                                                | × <sup>a</sup> | √ |                                                                                                                                            | × <sup>d</sup> |
| <i>Porphyromonas cansulci</i>                            | √ |                                                                                                                                                                | × <sup>a</sup> | √ |                                                                                                                                            | × <sup>d</sup> |
| <i>Porphyromonas catoniae</i>                            | √ |                                                                                                                                                                | √              | √ |                                                                                                                                            | √              |
| <i>Porphyromonas circumdentaria</i>                      | √ |                                                                                                                                                                | √              | √ |                                                                                                                                            | √              |
| <i>Porphyromonas endodontalis</i>                        | √ |                                                                                                                                                                | × <sup>a</sup> | √ |                                                                                                                                            | × <sup>d</sup> |
| <i>Porphyromonas gingivalis</i>                          | × | <i>P. gulae</i>                                                                                                                                                | × <sup>a</sup> | √ |                                                                                                                                            | × <sup>d</sup> |
| <i>Porphyromonas gulae</i>                               | × | <i>P. gingivalis</i>                                                                                                                                           | × <sup>a</sup> | √ |                                                                                                                                            | × <sup>d</sup> |
| <i>Porphyromonas levii</i>                               | √ |                                                                                                                                                                | × <sup>a</sup> | √ |                                                                                                                                            | × <sup>d</sup> |
| <i>Porphyromonas macacae</i>                             | √ |                                                                                                                                                                | × <sup>a</sup> | √ |                                                                                                                                            | × <sup>d</sup> |
| <i>Prevotella bivia</i>                                  | √ |                                                                                                                                                                | × <sup>a</sup> | √ |                                                                                                                                            | × <sup>d</sup> |
| <i>Prevotella buccae</i>                                 | √ |                                                                                                                                                                | √              | √ |                                                                                                                                            | √              |
| <i>Prevotella buccalis</i>                               | √ |                                                                                                                                                                | √              | √ |                                                                                                                                            | √              |
| <i>Prevotella corporis</i>                               | √ |                                                                                                                                                                | √              | √ |                                                                                                                                            | √              |
| <i>Prevotella dentalis</i>                               | √ |                                                                                                                                                                | × <sup>a</sup> | √ |                                                                                                                                            | × <sup>d</sup> |
| <i>Prevotella denticola</i>                              | √ |                                                                                                                                                                | √              | √ |                                                                                                                                            | √              |
| <i>Prevotella disiens</i>                                | √ |                                                                                                                                                                | √              | √ |                                                                                                                                            | √              |
| <i>Prevotella enoeca</i>                                 | √ |                                                                                                                                                                | × <sup>a</sup> | √ |                                                                                                                                            | × <sup>d</sup> |
| <i>Prevotella heparinolytica</i>                         | √ |                                                                                                                                                                | √              | ? | <i>P. zooglyphiformans</i>                                                                                                                 | ? <sup>f</sup> |
| <i>Prevotella intermedia</i>                             | √ |                                                                                                                                                                | × <sup>a</sup> | √ |                                                                                                                                            | × <sup>d</sup> |
| <i>Prevotella loescheii</i>                              | √ |                                                                                                                                                                | × <sup>a</sup> | √ |                                                                                                                                            | × <sup>d</sup> |
| <i>Prevotella melaninogenica</i>                         | √ |                                                                                                                                                                | × <sup>a</sup> | √ |                                                                                                                                            | × <sup>d</sup> |
| <i>Prevotella nigrescens</i>                             | √ |                                                                                                                                                                | × <sup>a</sup> | √ |                                                                                                                                            | √              |
| <i>Prevotella oralis</i>                                 | √ |                                                                                                                                                                | √              | √ |                                                                                                                                            | √              |
| <i>Prevotella oris</i>                                   | √ |                                                                                                                                                                | √              | √ |                                                                                                                                            | √              |
| <i>Prevotella oulorum</i>                                | √ |                                                                                                                                                                | √              | √ |                                                                                                                                            | √              |
| <i>Prevotella pallens</i>                                | √ |                                                                                                                                                                | × <sup>a</sup> | √ |                                                                                                                                            | × <sup>d</sup> |
| <i>Prevotella tanneriae</i>                              | √ |                                                                                                                                                                | × <sup>a</sup> | √ |                                                                                                                                            | × <sup>d</sup> |
| <i>Prevotella veroralis</i>                              | √ |                                                                                                                                                                | × <sup>a</sup> | √ |                                                                                                                                            | × <sup>d</sup> |
| <i>Prevotella zooglyphiformans</i>                       | √ |                                                                                                                                                                | √              | ? | <i>P. heparinolytica</i>                                                                                                                   | ? <sup>f</sup> |

|                                      |   |                                        |                |   |                   |                |
|--------------------------------------|---|----------------------------------------|----------------|---|-------------------|----------------|
| <i>Selenomonas diana</i>             | × | <i>S. flueggei</i> , <i>S. infelix</i> | × <sup>a</sup> | ? | <i>S. infelix</i> | × <sup>d</sup> |
| <i>Selenomonas flueggei</i>          | ? | <i>S. diana</i> , <i>S. infelix</i>    | × <sup>a</sup> | √ |                   | × <sup>d</sup> |
| <i>Selenomonas infelix</i>           | × | <i>S. diana</i> , <i>S. flueggei</i>   | × <sup>a</sup> | ? | <i>S. diana</i>   | × <sup>d</sup> |
| <i>Selenomonas noxia</i>             | √ |                                        | × <sup>a</sup> | √ |                   | × <sup>d</sup> |
| <i>Selenomonas sputigena</i>         | √ |                                        | √              | √ |                   | √              |
| <i>Sneathia sanguinegens</i>         | √ |                                        | × <sup>a</sup> | √ |                   | × <sup>d</sup> |
| <i>Succinivibrio dextrinosolvens</i> | √ |                                        | × <sup>a</sup> | √ |                   | × <sup>d</sup> |
| <i>Sutterella wadsworthensis</i>     | √ |                                        | × <sup>a</sup> | √ |                   | × <sup>d</sup> |
| <i>Tannerella forsythensis</i>       | √ |                                        | × <sup>a</sup> | √ |                   | × <sup>d</sup> |
| <i>Tissierella praeacuta</i>         | √ |                                        | √              | √ |                   | √              |

√, >3% difference between the 16S rRNA gene sequence of the species and those of other medically important bacteria

?, 2-3% difference between the 16S rRNA gene sequence of the species and that of a closely related medically important bacterium

×, <2% difference between the 16S rRNA gene sequence of the species and that of a closely related medically important bacterium

×<sup>a</sup>, the species is not included in the existing MicroSeq full 16S rDNA bacterial identification system database

×<sup>b</sup>, although the species is included in the existing MicroSeq full 16S rDNA bacterial identification system database, the high 16S rRNA gene sequence similarity (>98% nucleotide identity) between the species and a closely related species does not allow them to be distinguished confidently

?<sup>c</sup>, although the species is included in the existing MicroSeq full 16S rDNA bacterial identification system database, 2-3% difference is observed between the 16S rRNA gene of the species and a closely related species

×<sup>d</sup>, the species is not included in the existing MicroSeq 500 16S rDNA bacterial identification system database

×<sup>e</sup>, although the species is included in the existing MicroSeq 500 16S rDNA bacterial identification system database, the high 16S rRNA gene sequence similarity (>98% nucleotide identity) between the species and a closely related species does not allow them to be distinguished confidently

?<sup>f</sup>, although the species is included in the existing MicroSeq 500 16S rDNA bacterial identification system database, 2-3% difference is observed between the 16S rRNA gene of the species and a closely related species

**Supplementary Table 4** Usefulness of full 16S rRNA gene sequence, 5' end 527-bp 16S rRNA gene sequence and the existing MicroSeq 16S rDNA bacterial identification system databases for identification of medically important anaerobic cocci

| Bacteria                              | Full 16S rRNA gene sequence           |                                                                                        | 5' end 527-bp 16S rRNA gene sequence                                                   |                                       |                                                                                                 |                                                                                       |
|---------------------------------------|---------------------------------------|----------------------------------------------------------------------------------------|----------------------------------------------------------------------------------------|---------------------------------------|-------------------------------------------------------------------------------------------------|---------------------------------------------------------------------------------------|
|                                       | Usefulness for species identification | Medically important bacteria with similar (<3% difference) full 16S rRNA gene sequence | Usefulness of existing Microseq full 16S rDNA bacterial identification system database | Usefulness for species identification | Medically important bacteria with similar (<3% difference) 5' end 527-bp 16S rRNA gene sequence | Usefulness of existing Microseq 500 16S rDNA bacterial identification system database |
| <i>Acidaminococcus fermentans</i>     | √                                     |                                                                                        | × <sup>a</sup>                                                                         | √                                     |                                                                                                 | × <sup>d</sup>                                                                        |
| <i>Anaerococcus hydrogenalis</i>      | √                                     |                                                                                        | √                                                                                      | √                                     |                                                                                                 | √                                                                                     |
| <i>Anaerococcus lactolyticus</i>      | √                                     |                                                                                        | × <sup>a</sup>                                                                         | √                                     |                                                                                                 | × <sup>d</sup>                                                                        |
| <i>Anaerococcus octavius</i>          | √                                     |                                                                                        | × <sup>a</sup>                                                                         | √                                     |                                                                                                 | × <sup>d</sup>                                                                        |
| <i>Anaerococcus prevotii</i>          | √                                     |                                                                                        | √                                                                                      | √                                     |                                                                                                 | √                                                                                     |
| <i>Anaerococcus tetradius</i>         | √                                     |                                                                                        | √                                                                                      | √                                     |                                                                                                 | √                                                                                     |
| <i>Anaerococcus vaginalis</i>         | √                                     |                                                                                        | √                                                                                      | √                                     |                                                                                                 | √                                                                                     |
| <i>Centipeda periodontii</i>          | √                                     |                                                                                        | × <sup>a</sup>                                                                         | √                                     |                                                                                                 | × <sup>d</sup>                                                                        |
| <i>Finegoldia magna</i>               | √                                     |                                                                                        | × <sup>a</sup>                                                                         | √                                     |                                                                                                 | × <sup>d</sup>                                                                        |
| <i>Gallicola barnesae</i>             | √                                     |                                                                                        | × <sup>a</sup>                                                                         | √                                     |                                                                                                 | × <sup>d</sup>                                                                        |
| <i>Megasphaera elsdenii</i>           | √                                     |                                                                                        | × <sup>a</sup>                                                                         | √                                     |                                                                                                 | × <sup>d</sup>                                                                        |
| <i>Peptococcus niger</i>              | √                                     |                                                                                        | √                                                                                      | √                                     |                                                                                                 | √                                                                                     |
| <i>Peptoniphilus asaccharolyticus</i> | ×                                     | <i>P. indolicus</i>                                                                    | × <sup>a</sup>                                                                         | ?                                     | <i>P. indolicus</i>                                                                             | × <sup>d</sup>                                                                        |
| <i>Peptoniphilus harei</i>            | √                                     |                                                                                        | × <sup>a</sup>                                                                         | √                                     |                                                                                                 | × <sup>d</sup>                                                                        |
| <i>Peptoniphilus indolicus</i>        | ×                                     | <i>P. asaccharolyticus</i>                                                             | × <sup>a</sup>                                                                         | ?                                     | <i>P. asaccharolyticus</i>                                                                      | × <sup>d</sup>                                                                        |
| <i>Peptoniphilus ivorii</i>           | √                                     |                                                                                        | × <sup>a</sup>                                                                         | √                                     |                                                                                                 | × <sup>d</sup>                                                                        |
| <i>Peptoniphilus lacrimalis</i>       | √                                     |                                                                                        | √                                                                                      | √                                     |                                                                                                 | √                                                                                     |
| <i>Peptostreptococcus anaerobius</i>  | √                                     |                                                                                        | √                                                                                      | √                                     |                                                                                                 | √                                                                                     |
| <i>Peptostreptococcus micros</i>      | √                                     |                                                                                        | √                                                                                      | √                                     |                                                                                                 | √                                                                                     |
| <i>Ruminococcus productus</i>         | √                                     |                                                                                        | √                                                                                      | √                                     |                                                                                                 | √                                                                                     |
| <i>Veillonella atypica</i>            | ×                                     | <i>V. dispar</i> , <i>V. parvula</i>                                                   | × <sup>b</sup>                                                                         | ?                                     | <i>V. dispar</i>                                                                                | ? <sup>f</sup>                                                                        |
| <i>Veillonella dispar</i>             | ×                                     | <i>V. atypical</i> , <i>V. parvula</i>                                                 | × <sup>b</sup>                                                                         | ×                                     | <i>V. atypical</i> , <i>V. parvula</i>                                                          | × <sup>e</sup>                                                                        |
| <i>Veillonella parvula</i>            | ×                                     | <i>V. dispar</i> , <i>V. atypica</i>                                                   | × <sup>b</sup>                                                                         | ×                                     | <i>V. dispar</i>                                                                                | × <sup>e</sup>                                                                        |

√, >3% difference between the 16S rRNA gene sequence of the species and those of other medically important bacteria  
 ?, 2-3% difference between the 16S rRNA gene sequence of the species and that of a closely related medically important bacterium  
 ×, <2% difference between the 16S rRNA gene sequence of the species and that of a closely related medically important bacterium  
 ×<sup>a</sup>, the species is not included in the existing MicroSeq full 16S rDNA bacterial identification system database  
 ×<sup>b</sup>, although the species is included in the existing MicroSeq full 16S rDNA bacterial identification system database, the high 16S rRNA gene sequence similarity (>98% nucleotide identity) between the species and a closely related species does not allow them to be distinguished confidently  
 ?<sup>c</sup>, although the species is included in the existing MicroSeq full 16S rDNA bacterial identification system database, 2-3% difference is observed between the 16S rRNA gene of the species and a closely related species  
 ×<sup>d</sup>, the species is not included in the existing MicroSeq 500 16S rDNA bacterial identification system database  
 ×<sup>e</sup>, although the species is included in the existing MicroSeq 500 16S rDNA bacterial identification system database, the high 16S rRNA gene sequence similarity (>98% nucleotide identity) between the species and a closely related species does not allow them to be distinguished confidently  
 ?<sup>f</sup>, although the species is included in the existing MicroSeq 500 16S rDNA bacterial identification system database, 2-3% difference is observed between the 16S rRNA gene of the species and a closely related species
